1 **Iterative Subtractive Binning of Freshwater Chronoseries**  
2 **Metagenomes Identifies of over Four Hundred Novel Species**  
3 **and their Ecologic Preferences**

4

5 Rodriguez-R LM, Tsementzi D, Luo C, Konstantinidis KT\*

6

7 School of Civil and Environmental Engineering, Georgia Institute of Technology,  
8 311 Ferst Dr NW, Atlanta, GA 30332, USA.

9

10 \* To whom correspondence should be addressed: [kostas@ce.gatech.edu](mailto:kostas@ce.gatech.edu).

11

12 **Running title:** Iterative Subtractive Binning in Freshwater

13 **Keywords:** Metagenome-assembled genomes, diversity, lakes, community  
14 ecology, black-queen hypothesis, taxonomy

15

16

## 1 **Abstract**

2 Recent advances in sequencing technology and accompanying bioinformatic  
3 pipelines have allowed unprecedented access to the genomes of yet-uncultivated  
4 microorganisms from a wide array of natural and engineered environments.  
5 However, the catalogue of available genomes from uncultivated freshwater  
6 microbial populations remains limited, and most genome recovery attempts in  
7 freshwater ecosystems have only targeted few specific taxa. Here, we present a  
8 novel genome recovery pipeline, which incorporates iterative subtractive binning  
9 and apply it to a time series of metagenomic datasets from seven connected  
10 locations along the Chattahoochee River (Southeastern USA). Our set of  
11 Metagenome-Assembled Genomes (MAGs) represents over four hundred  
12 genomospecies yet to be named, which substantially increase the number of  
13 high-quality MAGs from freshwater lakes and represent about half of the total  
14 microbial community sampled. We propose names for two novel species that  
15 were represented by high-quality MAGs: “*Candidatus* Elulimicrobium humile”  
16 (“*Ca.* Elulimicrobiota” in the “Patescibacteria” group) and “*Candidatus* Aquidulcis  
17 frankliniae” (“Chloroflexi”). To evaluate the prevalence of these species in the  
18 chronoseries, we introduce novel approaches to estimate relative abundance and  
19 a habitat-preference score that control for uneven quality of the genomes and  
20 sample representation. Using these metrics, we demonstrate a high degree of  
21 habitat-specialization and endemism for most genomospecies observed in the  
22 Chattahoochee lacustrine ecosystem, as well as wider species ecological ranges  
23 associated with smaller genomes and higher coding densities, indicating an

1 overall advantage of smaller, more compact genomes for cosmopolitan  
2 distributions.

3

#### 4 **Introduction**

5 Freshwater environments represent a major microbial habitat on Earth, hosting  
6 an estimated  $1.3 \times 10^{26}$  prokaryotic cells worldwide [1, 2]. The level of diversity in  
7 microbial freshwater communities is orders of magnitude lower than that of other  
8 major environments such as soil and seawater [3], making them a tractable but  
9 globally important model for studying microbial community ecology. However, the  
10 lack of comprehensive sets of reference genomes and low cultivation rates  
11 hinder the study of these communities. On average, a quarter of freshwater  
12 community members detected by 16S rRNA gene or metagenomic surveys  
13 belong to yet-uncultured phyla, with an additional two thirds belonging to  
14 uncultured genera, families, or classes [4]. In fact, only a tenth of freshwater  
15 microbial cells belong to cultivated species or genera, the smallest cultivated  
16 fraction among all major environments on Earth (*i.e.*, environments with over  $10^{25}$   
17 microbial cells estimated worldwide [4]; but see also [5]). Recent efforts to  
18 recover metagenome-assembled genomes (MAGs) from freshwater  
19 environments have largely targeted specific taxa [6–10]. A few recent attempts  
20 recovered MAGs from all *Bacteria* and *Archaea* present in freshwater  
21 communities and resulted in three collections of MAGs from a lake in Siberia  
22 (Lake Baikal) and three lakes in North America (Lake Mendota, Trout Bog Lake,  
23 and Upper Mystic Lake) [11–13], as well as two collections from rivers in India

1 (Ganges River) and Greece (Kalamas River) [14, 15]. The fraction of the  
2 communities captured by these MAGs or other reference genomes is typically  
3 moderate to low due to the high diversity of freshwater communities as well as  
4 the limitations of the underlying binning methods, which are not optimized for  
5 chronoserries datasets from natural habitats but rather for single or small sets of  
6 samples from the exact same microbial community. Temporal and spatial series  
7 from freshwater ecosystems are even sparser; yet, such data could provide a  
8 more complete picture of seasonal and biogeographic patterns of the  
9 corresponding microbial communities that are important for human activities.

10 We introduce here a pipeline for the recovery of MAGs from sets of  
11 metagenomes through iterative subtractive binning and apply it to a  
12 metagenomic chronoserries from freshwater lakes and estuaries along the  
13 Chattahoochee River (Southeast USA). The abundance distribution of these  
14 population genomes in the meta-community was studied using two  
15 methodological innovations: an estimation of relative abundance controlling for  
16 completeness and micro-diversity issues in the genomes, and an ecologic  
17 preference score controlling for uneven sample representation. The collection of  
18 MAGs presented here captures 50-60% of the total source communities, which is  
19 about three times larger than previous binning efforts from comparable  
20 freshwater environments, and includes representatives from taxa yet to be  
21 named, ranging from novel species of previously described genera to novel  
22 phyla.

23

## 1 **Materials and Methods**

2 Additional information on software versions and parameters used is available in  
3 Table 1, and additional details are provided in the Text S1.

4

### 5 **Sample Collection and Metagenomic Sequencing**

6 All samples were collected from the lower epilimnion (typically 3-5m depth) of the  
7 Southeastern U.S. Lakes Lanier (GA), West Point (GA/AL), Harding (GA/AL),  
8 Eufaula (GA/AL), and Seminole (GA/FL) at least 10 m away from the littoral  
9 zone, and two locations in the Apalachicola estuary, off the coasts of  
10 Apalachicola and East Point (FL). Water samples were immediately stored at 4°C  
11 and processed typically within 1-4 h, and no more than a day post collection.  
12 Water was sequentially filtered with a peristaltic pump through 2.5 µm and 1.6  
13 µm porosity glass microfiber filters (Whatman), to capture large particles and  
14 eukaryotic cells, and microbial cells were eventually retained on 0.2 µm porosity  
15 Sterivex filters (Millipore). Thus, all sequenced metagenomes represent the 1.6-  
16 0.2 µm cell size fraction, except LLGFA\_1308A and LLGFA\_1309A that  
17 represent the 2.5-1.6 µm fraction. Filters were preserved at -80°C. DNA  
18 extraction was performed as previously described [16] with minor modifications  
19 and samples were sequenced using Illumina MiSeq and HiSeq sequencers (see  
20 Text S1, Metagenomic Sequencing). In addition, we included in our metagenome  
21 collection previously obtained viral enrichments (viral metagenomes) from the  
22 same freshwater samples [17] that were found to be highly contaminated with

1 bacterial cells. Those viral metagenomes were included in the binning process,  
2 but not in subsequent analyses.

3

#### 4 **Sequencing Data Processing**

5 All sequenced metagenomic datasets were subjected to quality control and those  
6 not passing minimum requirements were re-sequenced. Sequencing reads were  
7 trimmed and clipped using SolexaQA++ [18] and Scythe. Abundance-weighted  
8 average coverage of the datasets was estimated using Nonpareil [19]. A  
9 minimum dataset size of 1Gbp after trimming and 50% coverage were required  
10 for all samples in this study (Table S1).

11

#### 12 **Iterative Subtractive Binning**

13 An initial binning methodology was implemented using metadata-dependent  
14 grouping of samples to recover high-quality metagenome-assembled genomes  
15 (MAGs; Fig. 1, top row). Specifically, we grouped and co-assembled all cell-  
16 metagenomic samples from Lake Lanier (34 samples, 120 Gbp in total). The co-  
17 assembly strategy consisted of initial individual assemblies (IDBA-UD [20]),  
18 cutting resulting contigs (FastA.slider.pl [21]), and reassembling the fragments  
19 from all samples (IDBA-UD). We binned the final contigs using MetaBAT [22] and  
20 evaluated genome quality with CheckM [23]. MAGs with estimated completeness  
21 above 75% and contamination below 5% were considered of high quality, and  
22 the resulting set was labeled **LLD**.

1           Next, we implemented a strategy to recover MAGs using the complete  
2 collection of samples (Fig. 1). Our samples consisted of a roughly continuous  
3 two-dimensional scheme (temporal/spatial components), making metadata-  
4 based grouping of samples prone to subjective calls. Instead, we performed a  
5 sequence-based grouping by Markov Clustering (MCL) [21, 24] of Mash  
6 distances [25] using only values below 0.1. Each group was co-assembled  
7 (IDBA-UD), binned (MaxBin [26], Bowtie [27]), and evaluated using MiGA [28].  
8 MAGs with estimated genome quality above 50 were considered of high quality  
9 (see below genome quality definition), and the first resulting set was labeled  
10 **WB4**. The resulting set of high-quality MAGs (LLD + WB4) was used as  
11 reference database to map reads from all samples (Bowtie), and unmapped  
12 reads (SAMtools [29]) were used as input for Mash/MCL clustering, iterating the  
13 process described above to produce sets **WB5-WBB** (Fig. 1). The number of  
14 iterations was determined by saturation of phylogenetic breadth and fraction of  
15 reads mapping (Fig. 2). Finally, two corrections were implemented targeting  
16 groups that typically generate quality underestimations. First, a correction for  
17 archaeal genomes in MiGA was used to recover high-quality genomes from  
18 *Archaea* in all iterations (**WBC**). Second, the Random-Forest classifier for  
19 Candidate Phyla Radiation (CPR) scripts in Anvi'o [30] were used to detect high-  
20 quality genomes from CPR in all iterations, which didn't yield any additional  
21 MAGs. The complete collection of high-quality MAGs is hereafter designated WB  
22 (Table S2).  
23

## 1 **Genome Quality and Taxonomic Classification**

2 The quality and taxonomic classification of MAGs were evaluated using MiGA.  
3 Briefly, a composite index of genome quality was used, defined as  
4 “Completeness - 5xContamination”, where both completeness and contamination  
5 were determined by the presence and copy number of genes typically found in  
6 genomes of *Archaea* and *Bacteria* in single copy [21, 28]. Taxonomy was  
7 determined by MiGA with the NCBI Genome Database, Prokaryotic section  
8 (henceforth NCBI\_Prok; MiGA Online; Jan-2019) [28]. MiGA also performs a de-  
9 replication of the collection by generating groups of genomes with ANI  $\geq$  95%  
10 using ogs.mcl.rb [21, 24]. These clusters, analogous to bacterial or archaeal  
11 species [31, 32] are hereafter termed genomospecies (gspp, singular gsp).

## 12 13 **Genome Phylogeny**

14 Two phylogenetic approaches were used to place the obtained MAGs in the  
15 context of the tree of *Bacteria* (only 4 distinct species of *Archaea* were  
16 recovered). First, we used PhyloPhlAn [33] to place the genomes in the context  
17 of a general-purpose widely used genome collection. Next, we generated a  
18 phylogenetic reconstruction using the high-quality MAGs in this study classified  
19 as *Bacteria*, and all best-match entries (highest AAI) of our set against five  
20 collections of genomes available in MiGA Online at [http://microbial-](http://microbial-genomes.org/projects)  
21 [genomes.org/projects](http://microbial-genomes.org/projects). Namely, a manually curated collection of MAGs from  
22 various projects (**GCE**), a set of MAGs recovered from the Tara Oceans  
23 expedition (**TARA**) [34], a collection of MAGs recovered from various



1 environments excluding human microbiome (**UBA**) [35], all complete genomes  
2 available in NCBI (**NCBI\_Prok**), and all available genomes (complete or draft)  
3 from type material (**TypeMat**) [36]. Marker proteins were extracted from all the  
4 abovementioned genomes (HMM.essential.rb [21]), and those present in at least  
5 80% of the genomes were selected and independently aligned (Clustal Omega  
6 [37]). Next, maximum likelihood gene trees were constructed for individual  
7 alignments using RAxML [38] with model selected using ProtTest [39]. Finally, a  
8 species tree was estimated from the best-scoring ML trees reconstructed for  
9 each gene using ASTRAL-III [40].

10 Both final trees (PhyloPhIAn and ASTRAL) were used to estimate  
11 phylogenetic gain for the WB collection using Faith's Phylogenetic Diversity (PD  
12 [41]; Picante [42]):

$$\text{Phylogenetic Gain} = 1 - \frac{PD(\text{tree subset excluding WB})}{PD(\text{complete tree})}$$

13 In the ASTRAL tree, branch lengths for all terminal nodes were set to zero  
14 in this analysis. The taxonomic classification reported by NCBI for the genomes  
15 in the collections TypeMat, NCBI\_Prok, and UBA was recovered by MiGA, and  
16 used to calibrate taxonomic limits in coalescent units by identifying the median  
17 values between taxonomic ranks. In addition, this taxonomic information was  
18 used to decorate the rooted ASTRAL species tree (tax2tree [43]). The tree was  
19 visualized using FigTree.

20

21 **Genome annotation**

1 Functional annotation of all genomes was performed using Prokka [44]. Protein  
2 annotations from COG (Cluster of Orthologous Groups of proteins) were mapped  
3 to COG categories using eggNOG [45]. Gene coding density, G+C content, and  
4 other descriptive statistics, as well as genome completeness, contamination, and  
5 quality were calculated using MiGA [28]. Growth rate and optimal growth  
6 temperature were predicted using growthpred [46]. Extracellular proteins were  
7 predicted using PSORTb with Gram staining predicted by Traitar [47, 48].

8

### 9 **Abundance and Alpha Diversity**

10 The abundance of each gsp was estimated using the MAG of highest genome  
11 quality as representative. For each metagenomic dataset, the sequencing depth  
12 was estimated per position (Bowtie [27], bedtools [49]) and truncated to the  
13 central 80% (BedGraph.tad.rb [21]), a metric hereafter termed **TAD** (truncated  
14 average sequencing depth). Abundance was estimated as TAD normalized by  
15 the genome equivalents of the metagenomic dataset (MicrobeCensus [50]),  
16 resulting in units of community fraction. A gsp was considered to be present in a  
17 sample if the TAD was non-zero (equivalent to sequencing breadth  $\geq 10\%$ ,  
18 previously shown to correspond to confidence of presence  $> 95\%$  [51]). The  
19 alpha-diversity was estimated using the sequence diversity  $N_d$  projected to  
20 Shannon diversity  $H'$  (Nonpareil [3]), as well as  $H'$  on the gsp abundance profile  
21 (AlphaDiversity.pl [21]). Additional details are available on Text S2.

22

### 23 **Preference Scores**

1 In order to determine the preferential presence of a gsp in a given set of samples  
2 while accounting for the geographic and environmental biases in the dataset  
3 collection used here, we devised a preference score accounting for the expected  
4 abundance of a gsp in a given dataset (see Text S1, Preference Score). Briefly,  
5 we first estimated the **observed bias** (*i.e.*, over- or under-representation) in  
6 presence frequency of a gsp in a given set of samples compared to the rest of  
7 the samples. Next, we estimated the **expected bias** assuming that there is no  
8 preference by normalizing by both gsp presence frequency across all samples as  
9 well as the presence frequency of all gsp in each sample. This is achieved by  
10 estimating the expected frequency of each MAG in a metagenome as the  
11 frequency of MAGs in that metagenome multiplied by the frequency with which  
12 the MAG is observed across metagenomes. Finally, we calculate the ratio of  
13 these two biases (observed/expected) maintaining the sign of the observed bias.  
14 The preference score of gsp  $i$  for sample set  $t$  is termed  $s_i^p(t)$ . A score was  
15 considered significant when  $s_i^p(t) > 1$  (preference for the set  $t$ ) or  $s_i^p(t) < -1$   
16 (preference against set  $t$ ). No clear preference was established for gsp with  
17  $1 \geq s_i^p(t) \geq -1$ .

18

### 19 **Samples from Other Projects**

20 In addition to the metagenomes sequenced as part of our study, we used  
21 previously reported metagenomes from other sites and environments for  
22 comparisons. These metagenomes, derived from previous studies [13, 52–65], or  
23 recovered via MGnify [66], are described in Table S3. The raw reads were

1 obtained from the European Nucleotide Archive (EBI ENA) and processed as  
2 described above. The metadata for each sample was obtained from EBI ENA or  
3 the original studies, including biome, aquatic habitat, and geographic location  
4 (latitude and longitude).

5

## 6 **Metrics of Ecologic Range**

7 Ecologic ranges were measured in different dimensions reflecting environment  
8 and geographic location. Environments were characterized by **biome** (one of  
9 brackish water, estuary, estuary sediment, freshwater sediment, glacier,  
10 groundwater, human gut, lake, marine oxygen minimum zone, marine surface,  
11 marine water column, river, or soil) or **aquatic habitats** (brackish, estuary,  
12 freshwater, marine, non-aquatic), and for each gsp the **count breadth** (number  
13 of biomes or aquatic habitats) was determined by presence as non-zero TAD in  
14 the corresponding samples of the biome or habitat. In addition, the frequency of  
15 presence of a gsp across samples per biome or aquatic habitat was used to  
16 estimate the entropy (natural units), as proposed by Levins [67] (**unweighted**  
17 **Levins' breadth**). In order to account for the estimated abundances (and not  
18 only inferred presence), we also defined average abundance across samples per  
19 biome or aquatic habitat to estimate entropy (**weighted Levins' breadth**).  
20 Geographic distances were estimated using the distance on the ellipsoid [68]  
21 (geosphere). For each gsp, two geographic ranges were estimated: the  
22 maximum distance between any two samples where the gsp is present  
23 (**geodesic range**), and the maximum latitudinal range of samples where the gsp

1 is present (**latitude range**). Correlations between traits and ecologic ranges were  
2 evaluated by Pearson's linear correlation for continuous variables and  
3 Spearman's rank correlation for counts. Additionally, correlations along the  
4 ASTRAL phylogenetic reconstruction were evaluated using phylogenetic  
5 generalized least squares (nlme) assuming a Brownian model (ape [69]).

6

## 7 **Results**

### 8 **Freshwater Metagenomic Datasets**

9 We sequenced a total of 69 metagenomic datasets derived from water samples  
10 from Lakes Lanier, Harding, Eufaula, and Seminole, and the estuarine locations  
11 of Apalachicola and East Point along the Chattahoochee River, in the  
12 Southeastern continental USA (Table S1). All samples were collected from the  
13 lower epilimnion to allow comparisons across sites. All samples were required to  
14 have at least 60% coverage as estimated by Nonpareil [3], except for LL\_1007C  
15 (46% coverage) that had a high-coverage replicate (LL\_1007B, 83% coverage).  
16 Excluding the latter (LL\_1007C), samples had an average community coverage  
17 of 76% (Inter-Quartile Range –IQR–: 70.6-81.3%) and an average total size after  
18 trimming of 3.4 Gbp (IQR: 2.6-4.4 Gbp). The sequence diversity estimated by  
19 Nonpareil ( $N_d$ ) was on average 19.6 (IQR: 19.3-20.0), typical of freshwater  
20 microbial communities [3].

21

### 22 **Iterative Subtractive Binning**

1 An iterative subtractive binning methodology was applied to the collection of  
2 metagenomes described here. Briefly, metagenomic datasets were processed by  
3 grouping metagenomes by read-level similarity (Mash distances), co-assembling  
4 with or without subsampling, binning, mapping reads to high-quality obtained  
5 MAGs, and iterating this methodology with the resulting unmapped sequencing  
6 reads (Fig. 1; see also Materials and Methods). This method produced a total of  
7 1,126 MAGs grouped in 462 genomospecies, *i.e.*, clusters with intra-cluster ANI  
8  $\geq 95\%$ . The average estimated completeness of the MAGs in this set was 75.4%  
9 (IQR: 66.7-84.7%), and the average estimated contamination was 2.10% (IQR:  
10 0.9-2.7%). This result contrasts with the 199 MAGs identified in the initial non-  
11 iterative binning (LLD), grouped in 166 gsp. (Fig. 2-A), indicating that the  
12 iteration process captured at least three times higher taxonomic diversity. The  
13 initial quality control excluded all archaeal genomes captured, and the archaeal  
14 correction (WBC) recovered 22 genomes from 4 gsp. No additional genomes  
15 were recovered by the CPR correction.

16

### 17 **Diversity Captured**

18 The initial non-iterative binning (LLD) captured only 8-14% (IQR; average:  
19 11.5%) of the total metagenomic reads, depending on the dataset considered,  
20 whereas the final set captured 38-50% (IQR; average: 43.2%) of the total  
21 metagenomic reads (Fig. 2-B-C). These figures underscore the large increase in  
22 representation of the community throughout the iterative process. However, it is  
23 expected that this representation be strongly biased towards the most abundant

1 members of the community. In order to reduce the effects of genome size  
2 variation, completeness, and other artifacts, we estimated relative abundance of  
3 MAGs as truncated sequencing depth (TAD) normalized by genome equivalents  
4 (see Methods and Text S2). The estimated fraction of the community captured by  
5 the final set of MAGs was 42-59% (IQR; average: 50.2%). Importantly, this  
6 fraction is considerably larger than that of other available MAG sets from  
7 freshwater lakes, further underscoring the usefulness of iterative subtractive  
8 binning. For instance, a previous study on the microbial communities of Upper  
9 Mystic Lake (Massachusetts, USA) [12] recovered a set of 87 genomes from 14  
10 metagenomic datasets. Using the same abundance estimations as above, we  
11 calculated that those 87 genomes captured 11-18% (IQR; average: 14.9%) of the  
12 source communities. A smaller set of 35 MAGs recovered from two metagenomic  
13 dataset from the waters under the surface ice layer of Lake Baikal (Siberia,  
14 Russia) [11], resulted in 10 and 9.7% of the source communities captured at 20-  
15 and 4-m-deep samples, respectively. Finally, a set of 194 MAGs recovered from  
16 three chronoseries from the eutrophic Lake Mendota and the humic Trout Bog  
17 Lake (Wisconsin, USA) [13] resulted in 20.2%, 31.9%, and 38.4% of the  
18 communities captured in Lake Mendota, and the epilimnion and hypolimnion of  
19 Trout Bog Lake, respectively. In addition, we evaluated two riverine MAG  
20 datasets from Rivers Ganges (India) and Kalamas (Greece). The former,  
21 composed of 104 MAGs, captured on average 23.6% of the source communities  
22 (IQR: 18-33%), and the latter with 14 MAGs captured 7.4% (IQR: 6-10%).  
23 Overall, freshwater MAG sets from previous studies captured on average 16.7%

1 of the source communities (IQR: 10-20%), about three times less than the WB  
2 set presented in this study. However, note that the high metagenomic read  
3 recovery from the WB collection does not preclude other biases for community-  
4 level diversity assessment. Most notably, we identified that MAGs capture a  
5 disproportionally larger fraction of less diverse communities, indicating that profile  
6 summary statistics such as Shannon diversity or Richness estimations should not  
7 be computed directly from collections of MAGs (Fig. S1, Text S2).

8

### 9 **Phylogenetic Diversity and Novelty**

10 We reconstructed a coalescent-based phylogeny of all high-quality bacterial  
11 MAGs in this study (n=1,108 in 462 gspp) and related genomes (best-hit by AAI)  
12 in different reference collections (Fig. 3). The best-hit sets included genomes  
13 from GCE (n=96, from 591 genomes/393 gspp), TARA (n=173, from 957  
14 genomes/856 gspp), UBA (n=224, from 7,903 genomes/4,042 gspp), NCBI\_Prok  
15 (n=226, from 13,826 genomes/4,271 gspp), and TypeMat (n=143, from 9,077  
16 genomes/6,939 gspp). Marker proteins from all the abovementioned genomes  
17 (n=1,970) present in at least 80% of the genomes were selected (n=70, from 110  
18 proteins evaluated) for gene-tree reconstructions reconciled in the final species  
19 tree.

20 We characterized the global gain in phylogenetic diversity represented by our  
21 collection with respect to two reference sets. First, in the set of best-matching  
22 genomes described above (ASTRAL tree), our collection represents about 409  
23 novel species (out of 999 total species-level clades) and 70 novel genera (out of



1 332), based on approximated calibration of taxonomic ranks (as retrieved from  
2 NCBI) in the reconstructed phylogeny (Fig. S4-A-B). Overall, the gain in summed  
3 branch lengths (phylogenetic diversity) was estimated at 24.8%. A similar value  
4 of phylogenetic gain was obtained when comparing against a second reference  
5 set obtained directly from PhyloPhlAn (24.5%; Fig. S4-C-D). However, note that  
6 both estimates of phylogenetic gain are likely inflated since the former reference  
7 set does not include groups distant from any MAG in our collection (*i.e.*, we only  
8 used reference genomes identified as best matches to WB), and the latter does  
9 not include recently described taxa (PhyloPhlan version 0.99, last updated  
10 May/2013).

11

## 12 **Presence in Other Sites and Ecosystems**

13 We evaluated the presence of the WB gspp in samples from different  
14 environments, mainly aquatic (Fig. 4). WB species were considered present in a  
15 sample if their sequencing depth was at least 10%, which corresponds to  
16 confidence of presence > 95% [51]. In order to determine environmental or  
17 geographic preference, we estimated preference scores based on the  
18 frequencies of presence in different sets of samples, normalizing by the baseline  
19 distribution of each gsp and the probability of capturing any gsp in a given  
20 sample, and implicitly accounting for sample size and community evenness  
21 among other factors (see Methods; Fig. 4-A). Gspp tended to cluster in two main  
22 groups: freshwater (77%) and seawater (18%), with a few gspp showing no clear  
23 preference between fresh- and seawater (4%; Fig. 5-A). From 20 gspp showing

1 no clear preference, 19 were restricted to estuarine samples (classified as  
2 seawater in this test) and freshwater (Fig. 4-C), and one was observed in three  
3 marine samples at low abundances. Therefore, the lack of clear preference was  
4 likely the effect of low statistical power and/or water mixing in estuaries. Only 7  
5 gspp were present in both freshwater and marine samples (6  
6 *Synechococcaceae*), but all were detected in only 1 or 2 marine or freshwater  
7 samples at consistently low abundances ( $10^{-5}$ -0.01%). Therefore, no evidence of  
8 gspp adapted to both freshwater and marine environments was found. Among  
9 those with clear freshwater preference, 73% were predominantly found in the  
10 Chattahoochee lakes, and 33 gspp (9%) displayed a preference for Lake  
11 Mendota (Fig. 5-B). Finally, 53% of the seawater gspp had a clear preference for  
12 estuarine over marine samples, whereas the rest were evenly divided in  
13 preference for marine samples or no clear preference (Fig. 5-D).

14       Next, we determined the ecologic ranges of each gsp as the number of  
15 different biomes where it could be confidently detected (**biome count**), the  
16 number of aquatic habitats (**habitat count**), the maximum geographic distance  
17 between samples where it was detected (**geodesic range**), and the maximum  
18 range of latitudes (**latitude range**). Biome and aquatic habitat breadths were  
19 additionally measured by **unweighted** (frequency of presence) and **weighted**  
20 (abundance) **Levins' breadth** [67]. All metrics of ecologic range displayed  
21 significantly negative correlation with expected genome size (assembly length  
22 divided by estimated completeness;  $\rho$  or R between -0.18 and -0.3; p-values <  
23  $10^{-5}$ ) and positive correlation with coding density ( $\rho$  or R: 0.21-0.38; p-values <

1  $10^{-6}$ ), indicating that more cosmopolitan and habitat-generalist g spp exhibit  
2 smaller and more compact genomes (Figs. 6, S5). Among g spp in three aquatic  
3 habitats, WB8\_4xD\_006 had the highest coding density (96.2%, estimated  
4 genome: 1.07Mbp), previously identified as a member of an uncharacterized  
5 clade of “Ca. Pelagibacterales” temporarily designated PEL8 [10]. Most g spp  
6 present in three aquatic habitats in the top 20% of coding density belong to  
7 “Actinobacteria” (n=8) or “Ca. Pelagibacterales” (n=4) Despite this strong  
8 taxonomic bias, correlations between coding density and ecologic ranges  
9 remained statistically significant after excluding all members of “Actinobacteria”  
10 (p-values  $< 10^{-4}$ ), “Ca. Pelagibacterales” (p-values  $< 2.8 \times 10^{-4}$ ), or both (p-values  
11  $< 1.4 \times 10^{-3}$ ). On the other end, among g spp restricted to a single aquatic habitat,  
12 two genomes were particularly notable for their low coding density: WB6\_1B\_304  
13 (83.49%, estimated genome: 3.39 Mbp; “Cyanobacteria”) and WB9\_2\_319  
14 (85.1%, 4.77 Mbp; “Proteobacteria”; Fig. 6), and no taxonomic bias was  
15 observed in this set. In addition, genomes from more cosmopolitan g spp  
16 exhibited larger fractions of COG-annotated genes ( $\rho$  or R: 0.22-0.27; p-values  $<$   
17  $10^{-6}$ ). This effect was possibly due to a higher prevalence of better-characterized  
18 functions (housekeeping genes, central metabolism) in smaller genomes and/or  
19 database bias towards more broadly distributed microbes. We observed a  
20 significant negative correlation of G+C% content with count breadth of aquatic  
21 habitats (R: -0.1; p-value: 0.025) and weighted Levins’ breadths of both biome  
22 and aquatic habitat (R: -0.28, -0.29; p-values:  $2.5 \times 10^{-10}$ ,  $1.5 \times 10^{-9}$ ), but not with  
23 other environmental range metrics (Fig. S5). Other genomic signatures

1 associated with the growth strategy such as the density of ribosomal proteins  
2 (COG category J), estimated minimum generation time, and estimated optimal  
3 growth temperature were not significantly correlated with ecologic range metrics  
4 ( $|\rho$  or  $R| < 0.07$ ;  $p$ -values  $> 0.15$ ). However, when controlling for phylogenetic  
5 relatedness (assuming correlation under a Brownian model), the minimum  
6 generation time was negatively correlated with all metrics of ecologic range ( $p$ -  
7 values  $< 0.035$ ), indicating that faster growth is a trait that facilitates broader  
8 ecologic ranges among close relatives. Finally, we evaluated the possibility of  
9 larger fractions of extracellular proteins present in more cosmopolitan organisms,  
10 previously proposed as a mechanism of ecological success for pathogenic  
11 bacteria [70]. Interestingly, we observed the opposite trend: more cosmopolitan  
12 g spp were predicted to have fewer extracellular proteins as a fraction of their  
13 genome ( $\rho$  or  $R < -0.17$ ,  $p$ -values  $< 2.5 \times 10^{-4}$ ).

14

### 15 **Description of Novel Taxa**

16 Finally, we characterized the genomes representing two novel taxa. We propose  
17 the names "*Candidatus* Elulimicrobium humile" gen. nov. sp. nov., represented  
18 by WB6\_2A\_207 (GenBank: RGCK00000000), from a novel phylum  
19 ("*Candidatus* Elulota" phy. nov.) within the "Patescibacteria" group, and  
20 "*Candidatus* Aquadulcis frankliniae" gen. nov. sp. nov., represented by  
21 WB4\_1\_0576 (GenBank: RFPZ00000000), from a novel genus within the  
22 recently described class "*Candidatus* Limnocyndria" [6] ("Chloroflexi").

1 Additional description of these taxa including protologues is available as  
2 Supplementary Material (Text S3 and Fig. S2).

3

#### 4 **Discussion**

5 In this study, we introduced a methodology for iterative subtractive binning of  
6 metagenomic collections including *de novo* grouping of samples (*i.e.*,  
7 independent of metadata) and the gradual reduction of dataset diversity for the  
8 recovery of genomes from populations with vastly different relative abundances  
9 (Fig. 1). The genomes recovered showed on average a maximum relative  
10 abundance across samples of only 0.59% of the total microbial community (IQR:  
11 0.12-0.55%), with as many as 17% of the recovered genomospecies consistently  
12 below 0.1% relative abundance, considered the rare fraction in this ecosystem  
13 [71]. We were able to reconstruct the genome of a “Patescibacteria” bacterium  
14 for which we propose the name “*Ca. Elulimicrobium humile*”, representing a  
15 novel phylum (“*Ca. Elulota*”), that appears to be regionally widespread and  
16 endemic, but had consistently low abundance in our metagenome series ( $\leq$   
17 0.12%). Combined, all the gspp in our collection represent about 50% of the  
18 entire communities (Chattahoochee metagenomes), about three times more than  
19 other binning efforts in freshwater habitats. Importantly, we demonstrate that  
20 MAGs capture a larger fraction of less diverse communities. Therefore, we  
21 recommend against using summaries of abundance profiles from MAGs to  
22 characterize and/or compare entire communities (*e.g.*, measuring richness or

1 alpha/beta diversity from MAG profiles), and emphasize the advantages on  
2 phylogenetic novelty of individual populations instead.

3 Overall, from 462 genomospecies detected here, 452 (98%) represent  
4 novel species on the basis of ANI or 409 (88%) on the basis of approximate  
5 phylogenetic calibration, indicating that the great majority of genomes recovered  
6 here are novel. In terms of phylogenetic novelty, about one fourth of the branch  
7 lengths of a phylogenetic reconstruction including all best matches from complete  
8 genomes, type material, and MAGs, were uniquely derived from our set (Fig. S4).  
9 Moreover, the species detected in our samples span a variety of geographic  
10 ranges, from highly restricted locally to regionally or globally distributed in aquatic  
11 environments (Fig. 4). For example, we report here a novel species, for which we  
12 propose the name "*Ca. Aquidulcis frankliniae*" ("Chloroflexi"), that is widely  
13 distributed geographically but restricted to freshwater environments. This species  
14 (and genus) is clearly distinct from its closest relative ("*Ca. Limnocyndria* sp")  
15 based on phylogenetic reconstruction (Fig. S2-B) and AAI (71.85%). However, it  
16 would have remained cryptic if using 16S rRNA sequences alone, with a  
17 sequence identity of 98.4% between the two genera; a phenomenon previously  
18 observed for a few other bacterial taxa [32].

19 In order to evaluate preference (geographic or environmental), we devised  
20 a metric to compare expected and observed presence frequencies (Fig. 5) based  
21 on the observation that "presence" can be confidently assessed at the species  
22 level (95% ANI) and 0.05 p-value significance given a genome sequencing  
23 breadth of at least 10% [51]. All detected species appeared to have a preference

1 for either freshwater or saltwater, or were too scarcely present to determine  
2 preference. Moreover, our method was able to distinguish species present in the  
3 estuaries that appeared to be adapted to freshwater, seawater, or displaying a  
4 preference specifically to estuaries (Figs. 4, 5). This clear differentiation likely  
5 reflects the large number of genomic adaptations required for a  
6 freshwater/seawater transition (e.g., see [72, 73]).

7         Interestingly, we identified a statistically significant association between  
8 the ecologic range of gspp (in terms of habitat range and geographic distribution)  
9 and their genome size and coding density, indicating that more cosmopolitan  
10 gspp exhibit smaller, more compact genomes (Fig. S5). At first glance, this result  
11 might appear unexpected when considering that bacteria with more flexible and  
12 versatile metabolisms (multiple amenable carbon sources, detoxification  
13 mechanisms, or micronutrient scavenging capabilities) tend to have larger  
14 genomes, on average, and thus, are expected to colonize a higher number of  
15 ecological niches [74]. However, metabolic flexibility is also associated with  
16 fitness costs through the impact on growth rates, which may hinder the wider  
17 distribution across different habitats and long geographic distances. Indeed, we  
18 observed a phylogenetically-dependent negative association between estimated  
19 minimum generation time and ecologic range, indicating that (at short  
20 evolutionary distances) faster maximum growth facilitates more cosmopolitan  
21 distributions. These results support the hypothesis that benefits from metabolic  
22 flexibility provided by larger genomes could be superseded by the cost on fitness  
23 of replicating a longer genome and thus, longer generation times, on average

1 [75, 76]. This idea has been formally described as the Black Queen Hypothesis  
2 (BQH), positing that genome reduction confers an inherent selective advantage  
3 to bacteria [77]. BQH has been used to explain the genome reduction of taxa  
4 with high population numbers (small effective population sizes are typically used  
5 to explain genome reductions such as those observed in endosymbionts), as  
6 observed in the marine members of the genera “*Ca. Pelagibacter*” and  
7 *Prochlorococcus* [77, 78] as well as in freshwater microorganisms including  
8 members of “Actinobacteria” and “Chloroflexi” [6, 7]. Here, we show that the  
9 effects predicted by BQH may be observed across *Bacteria*. Moreover, BQH  
10 implies the reliance of cosmopolitan bacteria on cheating: unilaterally using  
11 common goods such as secreted metabolites and extracellular proteins. In  
12 contrast, it has been previously proposed that cooperative pathogenic bacteria,  
13 not cheaters, have wider host ranges [70]. We found that, in our collection, there  
14 is a negative correlation between the fraction of extracellular proteins and all  
15 evaluated ecologic range metrics, further supporting BQH.

16 A consequence of BQH pervasiveness is that its effects should be  
17 observable in entire communities, not only in specific populations. While this  
18 prediction remains speculative, it is worth noting that selection for generalists, an  
19 increase in functional diversity, and faster growth rates have been observed in  
20 prokaryotic communities after a strong disturbance without an associated  
21 increase in average genome sizes [79]. However, note that these observations  
22 are based on genomes from samples geographically and environmentally  
23 restricted, and the generalization to other aquatic systems remains speculative.



1           Finally, most of the analyses described above required a reliable  
2 estimation of the relative abundance of genomospecies in each dataset.  
3 However, estimating MAG abundances in metagenomes is encumbered by: (1)  
4 genome incompleteness and imperfect estimations of completeness, (2) genome  
5 contamination and time-consuming and subjective contamination identification,  
6 and (3) microdiversity potentially confounding gene-content diversity with  
7 technical artifacts like non-overlapping assemblies. We applied a novel approach  
8 to estimate MAG abundance in metagenomes that sidesteps these limitations.  
9 Two key corrections include (1) truncation of sequencing depth before averaging  
10 to exclude highly conserved regions (overestimating depth), regions with gene-  
11 content micro-diversity (underestimating depth), and contamination (both); and  
12 (2) normalization of sequencing depth by genome equivalents in the  
13 metagenome, allowing relative abundance estimates. Note that this approach  
14 aims to estimate the **relative abundance of the species in the community**  
15 (*i.e.*, number of cells per total cells), not the more common metric of **relative**  
16 **abundance of sequenced DNA** which is affected by genome sizes [80]. Our  
17 abundance estimates correlated well with read counts normalized by  
18 metagenome size and genome length (RPKM [81]), while revealing an expected  
19 error of about 0.26 percent points in the simpler metric of read fraction  
20 (significantly correlated with completeness and N50, unlike our estimate) as well  
21 as about 1/3 of non-zero read fractions being potentially spurious. The metric  
22 introduced here has several advantages with respect to RPKM: (1) it is  
23 expressed in units of community fraction and, thus, can be readily interpreted as

1 relative abundance, (2) it is robust to spurious high-depth regions due to highly  
2 conserved loci, and (3) the difference between zero and non-zero values is  
3 meaningful, as it corresponds to the tipping point for statistically significant  
4 presence.

5 In conclusion, we present methodological advances for the generation and  
6 study of MAGs derived from sets of related metagenomic datasets, and apply  
7 them to interconnected lakes and estuaries along the Chattahoochee River. This  
8 collection represents a valuable repository for the study of freshwater  
9 communities, and the methods introduced here are widely applicable to other  
10 metagenomic collections and environments. In addition, we show that  
11 cosmopolitan g spp tend to display smaller genomes with a phylogenetically-  
12 dependent association with faster growth rates, potentially reflecting the effects  
13 of the Black Queen Hypothesis.

14

#### 15 **Data Availability**

16 High-quality bins, distances, and other taxonomic analyses are available at  
17 [http://microbial-genomes.org/projects/WB\\_binsHQ](http://microbial-genomes.org/projects/WB_binsHQ). Assembled genomes were  
18 also deposited in the NCBI GenBank database under BioProject PRJNA495371.  
19 All metagenomic datasets from the Chattahoochee samples are available in the  
20 NCBI SRA database as part of the BioProject PRJNA497294. Additional  
21 metadata on the provenance of sets in the iterative subtractive binning is also  
22 available as BioSamples SAMN10265471-SAMN10265528.

23

## 1 **Acknowledgments**

2 We thank James R. Cole, James M. Tiedje (Michigan State University), William  
3 B. Whitman (University of Georgia, Athens), and Ramon Rosselló-Mora  
4 (Mediterranean Institute for Advanced Studies) for useful discussions on the  
5 methodology applied and ecologic implications of our results. We also thank  
6 Brittany Suttner, Yuanqi Wang, and Carlos A. Ruiz Perez (Georgia Institute of  
7 Technology) for support on fieldwork and sample processing, and Janet Hatt  
8 (Georgia Institute of Technology), and Patrick Chain (Los Alamos National  
9 Laboratory) for support on sample sequencing.

10

## 11 **Funding**

12 This work was partly funded by the US National Science Foundation, awards  
13 #1241046 and #1759831 (to KTK).

14

## 15 **Competing Interests**

16 The authors declare no competing interests.

17

## 18 **References**

- 19 1. Whitman WB, Coleman DC, Wiebe WJ. Prokaryotes: The unseen majority. *Proc*  
20 *Natl Acad Sci* 1998; **95**: 6578–6583.
- 21 2. Austin B (ed). *Methods in aquatic bacteriology*. 1988. Wiley, Chichester; New  
22 York.

- 1 3. Rodriguez-R LM, Gunturu S, Tiedje JM, Cole JR, Konstantinidis KT. Nonpareil 3:  
2 Fast Estimation of Metagenomic Coverage and Sequence Diversity. *mSystems*  
3 2018; **3**: e00039-18.
- 4 4. Lloyd KG, Steen AD, Ladau J, Yin J, Crosby L. Phylogenetically Novel Uncultured  
5 Microbial Cells Dominate Earth Microbiomes. *mSystems* 2018; **3**: e00055-18.
- 6 5. Martiny AC. High proportions of bacteria are culturable across major biomes.  
7 *ISME J* 2019; **1**.
- 8 6. Mehrshad M, Salcher MM, Okazaki Y, Nakano S, Šimek K, Andrei A-S, et al.  
9 Hidden in plain sight—highly abundant and diverse planktonic freshwater  
10 Chloroflexi. *Microbiome* 2018; **6**: 176.
- 11 7. Neuenschwander SM, Ghai R, Pernthaler J, Salcher MM. Microdiversification in  
12 genome-streamlined ubiquitous freshwater Actinobacteria. *ISME J* 2018; **12**:  
13 185–198.
- 14 8. Cabello-Yeves PJ, Ghai R, Mehrshad M, Picazo A, Camacho A, Rodriguez-Valera F.  
15 Reconstruction of Diverse Verrucomicrobial Genomes from Metagenome  
16 Datasets of Freshwater Reservoirs. *Front Microbiol* 2017; **8**.
- 17 9. He S, Stevens SLR, Chan L-K, Bertilsson S, Rio TG del, Tringe SG, et al.  
18 Ecophysiology of Freshwater Verrucomicrobia Inferred from Metagenome-  
19 Assembled Genomes. *mSphere* 2017; **2**: e00277-17.
- 20 10. Tsementzi D, Rodriguez-R LM, Ruiz-Perez CA, Meziti A, Hatt JK, Konstantinidis  
21 KT. Ecogenomic characterization of widespread, closely-related SAR11 clades  
22 of the freshwater genus “Candidatus Fonsibacter” and proposal of Ca.  
23 *Fonsibacter lacus* sp. nov. *Syst Appl Microbiol* 2019.

- 1 11. Cabello-Yeves PJ, Zemskaia TI, Rosselli R, Coutinho FH, Zakharenko AS, Blinov  
2 VV, et al. Genomes of Novel Microbial Lineages Assembled from the Sub-Ice  
3 Waters of Lake Baikal. *Appl Environ Microbiol* 2018; **84**: e02132-17.
- 4 12. Arora-Williams K, Olesen SW, Scandella BP, Delwiche K, Spencer SJ, Myers EM, et  
5 al. Dynamics of microbial populations mediating biogeochemical cycling in a  
6 freshwater lake. *Microbiome* 2018; **6**: 165.
- 7 13. Linz AM, He S, Stevens SLR, Anantharaman K, Rohwer RR, Malmstrom RR, et al.  
8 Freshwater carbon and nutrient cycles revealed through reconstructed  
9 population genomes. *PeerJ* 2018; **6**: e6075.
- 10 14. Zhang S-Y, Tsementzi D, Hatt JK, Bivins A, Khelurkar N, Brown J, et al. Intensive  
11 allochthonous inputs along the Ganges River and their effect on microbial  
12 community composition and dynamics. *Environ Microbiol* 2019; **21**: 182–196.
- 13 15. Meziti A, Tsementzi D, Rodriguez-R LM, Hatt JK, Karayanni H, Kormas KA, et al.  
14 Quantifying the changes in genetic diversity within sequence-discrete bacterial  
15 populations across a spatial and temporal riverine gradient. *ISME J* 2019; **13**:  
16 767.
- 17 16. DeLong EF, Preston CM, Mincer T, Rich V, Hallam SJ, Frigaard N-U, et al.  
18 Community Genomics Among Stratified Microbial Assemblages in the Ocean's  
19 Interior. *Science* 2006; **311**: 496–503.
- 20 17. Ruiz-Perez CA, Tsementzi D, Hatt JK, Sullivan MB, Konstantinidis KT. Prevalence  
21 of viral photosynthesis genes along a freshwater to saltwater transect in  
22 Southeast USA. *Environ Microbiol Rep* 2019; **0**.

- 1 18. Cox MP, Peterson DA, Biggs PJ. SolexaQA: At-a-glance quality assessment of  
2 Illumina second-generation sequencing data. *BMC Bioinformatics* 2010; **11**:  
3 485.
- 4 19. Rodriguez-R LM, Konstantinidis KT. Nonpareil: a redundancy-based approach to  
5 assess the level of coverage in metagenomic datasets. *Bioinformatics* 2014; **30**:  
6 629–635.
- 7 20. Peng Y, Leung HCM, Yiu SM, Chin FYL. IDBA-UD: a de novo assembler for single-  
8 cell and metagenomic sequencing data with highly uneven depth.  
9 *Bioinformatics* 2012; **28**: 1420–1428.
- 10 21. Rodriguez-R LM, Konstantinidis KT. The enveomics collection: a toolbox for  
11 specialized analyses of microbial genomes and metagenomes. *PeerJ Prepr* 2016;  
12 **4**: e1900v1.
- 13 22. Kang DD, Froula J, Egan R, Wang Z. MetaBAT, an efficient tool for accurately  
14 reconstructing single genomes from complex microbial communities. *PeerJ*  
15 2015; **3**: e1165.
- 16 23. Parks DH, Imelfort M, Skennerton CT, Hugenholtz P, Tyson GW. CheckM:  
17 assessing the quality of microbial genomes recovered from isolates, single cells,  
18 and metagenomes. *Genome Res* 2015; **25**: 1043–1055.
- 19 24. Van Dongen S. MCL - a cluster algorithm for graphs. Retrieved from  
20 <https://micans.org/mcl/>. <https://micans.org/mcl/>. Accessed 3 Jul 2017.
- 21 25. Ondov BD, Treangen TJ, Melsted P, Mallonee AB, Bergman NH, Koren S, et al.  
22 Mash: fast genome and metagenome distance estimation using MinHash.  
23 *Genome Biol* 2016; **17**: 132.

- 1 26. Wu Y-W, Tang Y-H, Tringe SG, Simmons BA, Singer SW. MaxBin: an automated  
2 binning method to recover individual genomes from metagenomes using an  
3 expectation-maximization algorithm. *Microbiome* 2014; **2**: 26.
- 4 27. Langmead B, Salzberg SL. Fast gapped-read alignment with Bowtie 2. *Nat*  
5 *Methods* 2012; **9**: 357–359.
- 6 28. Rodriguez-R LM, Gunturu S, Harvey WT, Rosselló-Mora R, Tiedje JM, Cole JR, et  
7 al. The Microbial Genomes Atlas (MiGA) webserver: taxonomic and gene  
8 diversity analysis of Archaea and Bacteria at the whole genome level. *Nucleic*  
9 *Acids Res* 2018; **46**.
- 10 29. Li H, Handsaker B, Wysoker A, Fennell T, Ruan J, Homer N, et al. The Sequence  
11 Alignment/Map format and SAMtools. *Bioinformatics* 2009; **25**: 2078–2079.
- 12 30. Eren AM, Esen ÖC, Quince C, Vineis JH, Morrison HG, Sogin ML, et al. Anvi'o: an  
13 advanced analysis and visualization platform for 'omics data. *PeerJ* 2015; **3**:  
14 e1319.
- 15 31. Konstantinidis KT, Tiedje JM. Towards a Genome-Based Taxonomy for  
16 Prokaryotes. *J Bacteriol* 2005; **187**: 6258–6264.
- 17 32. Rodriguez-R LM, Castro JC, Kyrpides NC, Cole JR, Tiedje JM, Konstantinidis KT.  
18 How Much Do rRNA Gene Surveys Underestimate Extant Bacterial Diversity?  
19 *Appl Environ Microbiol* 2018; **84**: e00014-18.
- 20 33. Segata N, Börnigen D, Morgan XC, Huttenhower C. PhyloPhlAn is a new method  
21 for improved phylogenetic and taxonomic placement of microbes. *Nat Commun*  
22 2013; **4**: 2304.

- 1 34. Delmont TO, Quince C, Shaiber A, Esen ÖC, Lee ST, Rappé MS, et al. Nitrogen-  
2 fixing populations of Planctomycetes and Proteobacteria are abundant in  
3 surface ocean metagenomes. *Nat Microbiol* 2018; 1.
- 4 35. Parks DH, Rinke C, Chuvochina M, Chaumeil P-A, Woodcroft BJ, Evans PN, et al.  
5 Recovery of nearly 8,000 metagenome-assembled genomes substantially  
6 expands the tree of life. *Nat Microbiol* 2017; 2: 1533.
- 7 36. Federhen S. Type material in the NCBI Taxonomy Database. *Nucleic Acids Res*  
8 2015; 43: D1086–D1098.
- 9 37. Sievers F, Wilm A, Dineen D, Gibson TJ, Karplus K, Li W, et al. Fast, scalable  
10 generation of high-quality protein multiple sequence alignments using Clustal  
11 Omega. *Mol Syst Biol* 2011; 7: 539.
- 12 38. Stamatakis A. RAxML version 8: a tool for phylogenetic analysis and post-  
13 analysis of large phylogenies. *Bioinformatics* 2014; 30: 1312–1313.
- 14 39. Darriba D, Taboada GL, Doallo R, Posada D. ProtTest 3: fast selection of best-fit  
15 models of protein evolution. *Bioinformatics* 2011; 27: 1164–1165.
- 16 40. Zhang C, Rabiee M, Sayyari E, Mirarab S. ASTRAL-III: polynomial time species  
17 tree reconstruction from partially resolved gene trees. *BMC Bioinformatics*  
18 2018; 19: 153.
- 19 41. Faith DP. Conservation evaluation and phylogenetic diversity. *Biol Conserv* 1992;  
20 61: 1–10.
- 21 42. Kembel SW, Cowan PD, Helmus MR, Cornwell WK, Morlon H, Ackerly DD, et al.  
22 Picante: R tools for integrating phylogenies and ecology. *Bioinformatics* 2010;  
23 26: 1463–1464.



- 1 43. McDonald D, Price MN, Goodrich J, Nawrocki EP, DeSantis TZ, Probst A, et al. An  
2 improved Greengenes taxonomy with explicit ranks for ecological and  
3 evolutionary analyses of bacteria and archaea. *ISME J* 2012; **6**: 610–618.
- 4 44. Seemann T. Prokka: rapid prokaryotic genome annotation. *Bioinformatics* 2014;  
5 **30**: 2068–2069.
- 6 45. Huerta-Cepas J, Szklarczyk D, Heller D, Hernández-Plaza A, Forslund SK, Cook H,  
7 et al. eggNOG 5.0: a hierarchical, functionally and phylogenetically annotated  
8 orthology resource based on 5090 organisms and 2502 viruses. *Nucleic Acids*  
9 *Res* 2019; **47**: D309–D314.
- 10 46. Vieira-Silva S, Rocha EPC. The Systemic Imprint of Growth and Its Uses in  
11 Ecological (Meta)Genomics. *PLOS Genet* 2010; **6**: e1000808.
- 12 47. Yu NY, Wagner JR, Laird MR, Melli G, Rey S, Lo R, et al. PSORTb 3.0: improved  
13 protein subcellular localization prediction with refined localization  
14 subcategories and predictive capabilities for all prokaryotes. *Bioinformatics*  
15 2010; **26**: 1608–1615.
- 16 48. Weimann A, Mooren K, Frank J, Pope PB, Bremges A, McHardy AC. From  
17 Genomes to Phenotypes: Traitair, the Microbial Trait Analyzer. *mSystems* 2016;  
18 **1**: e00101-16.
- 19 49. Quinlan AR, Hall IM. BEDTools: a flexible suite of utilities for comparing genomic  
20 features. *Bioinformatics* 2010; **26**: 841–842.
- 21 50. Nayfach S, Pollard KS. Average genome size estimation improves comparative  
22 metagenomics and sheds light on the functional ecology of the human  
23 microbiome. *Genome Biol* 2015; **16**.

- 1 51. Castro JC, Rodriguez-R LM, Harvey WT, Weigand MR, Hatt JK, Carter MQ, et al.  
2 imGLAD: accurate detection and quantification of target organisms in  
3 metagenomes. *PeerJ* 2018; **6**: e5882.
- 4 52. Bendall ML, Stevens SL, Chan L-K, Malfatti S, Schwientek P, Tremblay J, et al.  
5 Genome-wide selective sweeps and gene-specific sweeps in natural bacterial  
6 populations. *ISME J* 2016; **10**: 1589–1601.
- 7 53. Brown CT, Hug LA, Thomas BC, Sharon I, Castelle CJ, Singh A, et al. Unusual  
8 biology across a group comprising more than 15% of domain Bacteria. *Nature*  
9 2015; **523**: 208–211.
- 10 54. Eiler A, Zaremba-Niedzwiedzka K, Martínez-García M, McMahon KD,  
11 Stepanauskas R, Andersson SGE, et al. Productivity and salinity structuring of  
12 the microplankton revealed by comparative freshwater metagenomics. *Environ*  
13 *Microbiol* 2014; **16**: 2682–2698.
- 14 55. Hugerth LW, Larsson J, Alneberg J, Lindh MV, Legrand C, Pinhassi J, et al.  
15 Metagenome-assembled genomes uncover a global brackish microbiome.  
16 *Genome Biol* 2015; **16**: 279.
- 17 56. Meziti A, Tsementzi D, Ar. Kormas K, Karayanni H, Konstantinidis KT.  
18 Anthropogenic effects on bacterial diversity and function along a river-to-  
19 estuary gradient in Northwest Greece revealed by metagenomics. *Environ*  
20 *Microbiol* 2016; **18**: 4640–4652.
- 21 57. Nielsen HB, Almeida M, Juncker AS, Rasmussen S, Li J, Sunagawa S, et al.  
22 Identification and assembly of genomes and genetic elements in complex

- 1 metagenomic samples without using reference genomes. *Nat Biotechnol* 2014;  
2 **32**: 822–828.
- 3 58. Seitz KW, Lazar CS, Hinrichs K-U, Teske AP, Baker BJ. Genomic reconstruction of  
4 a novel, deeply branched sediment archaeal phylum with pathways for  
5 acetogenesis and sulfur reduction. *ISME J* 2016; **10**: 1696–1705.
- 6 59. Simon C, Wiezer A, Strittmatter AW, Daniel R. Phylogenetic Diversity and  
7 Metabolic Potential Revealed in a Glacier Ice Metagenome. *Appl Environ*  
8 *Microbiol* 2009; **75**: 7519–7526.
- 9 60. Staley C, Gould TJ, Wang P, Phillips J, Cotner JB, Sadowsky MJ. Bacterial  
10 community structure is indicative of chemical inputs in the Upper Mississippi  
11 River. *Front Microbiol* 2014; **5**.
- 12 61. Sunagawa S, Coelho LP, Chaffron S, Kultima JR, Labadie K, Salazar G, et al.  
13 Structure and function of the global ocean microbiome. *Science* 2015; **348**:  
14 1261359.
- 15 62. Tsementzi D, Wu J, Deutsch S, Nath S, Rodriguez-R LM, Burns AS, et al. SAR11  
16 bacteria linked to ocean anoxia and nitrogen loss. *Nature* 2016; **536**: 179–183.
- 17 63. Vázquez-Campos X, Kinsela AS, Bligh MW, Harrison JJ, Payne TE, Waite TD.  
18 Response of Microbial Community Function to Fluctuating Geochemical  
19 Conditions within a Legacy Radioactive Waste Trench Environment. *Appl*  
20 *Environ Microbiol* 2017; **83**: e00729-17.
- 21 64. Yan Q, Bi Y, Deng Y, He Z, Wu L, Van Nostrand JD, et al. Impacts of the Three  
22 Gorges Dam on microbial structure and potential function. *Sci Rep* 2015; **5**:  
23 8605.

- 1 65. Toyama D, Kishi LT, Santos-Júnior CD, Soares-Costa A, Oliveira TCS de, Miranda  
2 FP de, et al. Metagenomics Analysis of Microorganisms in Freshwater Lakes of  
3 the Amazon Basin. *Genome Announc* 2016; **4**: e01440-16.
- 4 66. Mitchell A, Bucchini F, Cochrane G, Denise H, Hoopen P ten, Fraser M, et al. EBI  
5 metagenomics in 2016 - an expanding and evolving resource for the analysis  
6 and archiving of metagenomic data. *Nucleic Acids Res* 2016; **44**: D595–D603.
- 7 67. Levins R. Evolution in Changing Environments: Some Theoretical Explorations.  
8 1968. Princeton University Press.
- 9 68. Vincenty T. Direct and Inverse Solutions of Geodesics on the Ellipsoid with  
10 Application of Nested Equations. *Surv Rev* 1975; **23**: 88–93.
- 11 69. Paradis E, Claude J, Strimmer K. APE: Analyses of Phylogenetics and Evolution in  
12 R language. *Bioinformatics* 2004; **20**: 289–290.
- 13 70. McNally L, Viana M, Brown SP. Cooperative secretions facilitate host range  
14 expansion in bacteria. *Nat Commun* 2014; **5**: 4594.
- 15 71. Tsementzi D, Poretsky R, Rodriguez-R LM, Luo C, Konstantinidis KT. Evaluation  
16 of metatranscriptomic protocols and application to the study of freshwater  
17 microbial communities. *Environ Microbiol Rep* 2014; **6**: 640–655.
- 18 72. Henson MW, Lanclos VC, Faircloth BC, Thrash JC. Cultivation and genomics of the  
19 first freshwater SAR11 (LD12) isolate. *ISME J* 2018; **12**: 1846.
- 20 73. Oh S, Caro-Quintero A, Tsementzi D, DeLeon-Rodriguez N, Luo C, Poretsky R, et  
21 al. Metagenomic Insights into the Evolution, Function, and Complexity of the  
22 Planktonic Microbial Community of Lake Lanier, a Temperate Freshwater  
23 Ecosystem. *Appl Environ Microbiol* 2011; **77**: 6000–6011.

- 1 74. Konstantinidis KT, Tiedje JM. Genomic insights that advance the species  
2 definition for prokaryotes. *Proc Natl Acad Sci U S A* 2005; **102**: 2567–2572.
- 3 75. Ochman H, Moran NA. Genes Lost and Genes Found: Evolution of Bacterial  
4 Pathogenesis and Symbiosis. *Science* 2001; **292**: 1096–1099.
- 5 76. Giovannoni SJ, Tripp HJ, Givan S, Podar M, Vergin KL, Baptista D, et al. Genome  
6 Streamlining in a Cosmopolitan Oceanic Bacterium. *Science* 2005; **309**: 1242–  
7 1245.
- 8 77. Morris JJ, Lenski RE, Zinser ER. The Black Queen Hypothesis: Evolution of  
9 Dependencies through Adaptive Gene Loss. *mBio* 2012; **3**: e00036-12.
- 10 78. Giovannoni SJ, Thrash JC, Temperton B. Implications of streamlining theory for  
11 microbial ecology. *ISME J* 2014; **8**: 1553–1565.
- 12 79. Rodriguez-R LM, Overholt WA, Hagan C, Huettel M, Kostka JE, Konstantinidis KT.  
13 Microbial community successional patterns in beach sands impacted by the  
14 Deepwater Horizon oil spill. *ISME J* 2015; **9**: 1928–1940.
- 15 80. Bankevich A, Pevzner P. Long Reads Enable Accurate Estimates of Complexity of  
16 Metagenomes. *Res. Comput. Mol. Biol.* 2018. Springer, Cham, pp 1–20.
- 17 81. Mortazavi A, Williams BA, McCue K, Schaeffer L, Wold B. Mapping and  
18 quantifying mammalian transcriptomes by RNA-Seq. *Nat Methods* 2008; **5**:  
19 621–628.
- 20 82. Albertsen M, Hugenholtz P, Skarshewski A, Nielsen KL, Tyson GW, Nielsen PH.  
21 Genome sequences of rare, uncultured bacteria obtained by differential  
22 coverage binning of multiple metagenomes. *Nat Biotechnol* 2013; **31**: 533–538.

- 1 83. Parks DH, Chuvochina M, Waite DW, Rinke C, Skarshewski A, Chaumeil P-A, et al.  
2 A standardized bacterial taxonomy based on genome phylogeny substantially  
3 revises the tree of life. *Nat Biotechnol* 2018; **36**: 996–1004.
- 4 84. Zhao Y, Liu S, Jiang B, Feng Y, Zhu T, Tao H, et al. Genome-Centered  
5 Metagenomics Analysis Reveals the Symbiotic Organisms Possessing Ability to  
6 Cross-Feed with Anammox Bacteria in Anammox Consortia. *Environ Sci Technol*  
7 2018; **52**: 11285–11296.
- 8

## 1 **Figure and Table legends**

2

3 **Figure 1:** Diagram of the iterative subtractive binning methodology applied in this  
4 study. Input data (bold) and processes are depicted as light grey boxes, data flow  
5 as arrows, and output sets of MAGs as dark grey boxes. The initial non-iterative  
6 binning of Lake Lanier metagenomes corresponds to the set LLD, and the 8  
7 iterations including all datasets correspond to the sets WB4-WBB. After the  
8 iterative approach, two targeted corrections were applied corresponding to WBC  
9 (*Archaea*) and the empty set WBD (CPR). QC stands for Quality Control, and HQ  
10 stands for High Quality.

11

12 **Figure 2:** Saturation of captured diversity along the iterative subtractive binning  
13 rounds. **(A)** Total number of clades captured with ANI  $\geq$  95% (light blue,  
14 representing species level), AAI  $\geq$  60% (dark blue, roughly corresponding to  
15 genus level), and AAI  $\geq$  40% (grey, roughly corresponding to phylum level). Note  
16 that the range of AAI values (a proxy for genetic relatedness) within genera and  
17 phyla typically varies between clades, and the latter two thresholds shouldn't be  
18 considered as precise estimates of taxonomic diversity. **(B-C)** Total fraction of  
19 metagenomic reads from each dataset mapping to the complete (cumulative)  
20 collection of MAGs after each iteration. Each line represents a metagenomic  
21 dataset derived from Lake Lanier (B), other lakes (C, blue), or estuarine samples  
22 (C, green).

23

1 **Figure 3:** Phylogenetic reconstruction of the bacterial MAGs in this study and  
2 closest relatives derived from five different genome collections. The phylogeny  
3 was reconstructed using coalescent-based species tree estimation [40] from 70  
4 gene trees reconstructed by Maximum Likelihood [38, 39]. The tree is decorated  
5 with colored backgrounds corresponding to phyla (or classes in “Proteobacteria”),  
6 labeled in the innermost ring. Light grey background corresponds to taxa not  
7 including any representatives from our collection, and dark grey corresponds to  
8 yet-unnamed taxa. The next ring indicates the genome collection (see legend),  
9 emphasizing genomes from type material (purple, with accent dots inwards) and  
10 from the current study (blue, extending outwards). The following double-ring  
11 corresponds to the innermost background (phyla or classes, inwards) and the  
12 larger containing group as labeled in the outermost ring (superphyla or the  
13 phylum “Proteobacteria”, outwards). The labels use abbreviations for the  
14 following taxa (clockwise): “Patescibacteria” (Patesc., also referred to as CPR),  
15 “Ca. Saccharibacteria” (Sacc.), “Ca. Katanobacteria” (Kata., also referred to as  
16 WWE3), “Ca. Uhrbacteria” (Uhr.), “Ca. Wolfbacteria” (Wolf.), “Ca.  
17 Nomurabacteria” (Nom.), “Tenericutes” (Ten.), “Firmicutes” (Firm.), “Chloroflexi”  
18 (Chl.), “Cyanobacteria” (Cyano.), “Aquificae” (Aqu.), “Planctomycetes” (Plancto.),  
19 “Chlamydiae” (Chlam.), “Verrucomicrobia” (Verruco.), “Gemmatimonadetes”  
20 (Gem.), “Deferribacteres” (Def.), “Marinimicrobia” (Mar.), “Ignavibacteriae” (Ign.),  
21 “Spirochaetes” (Spir.), “Acidobacteria” (Acid.), “Dependentiae” (Dep.),  
22 *Deltaproteobacteria* (Delta.), *Acidiferrobacteria* (Acidiferro.), and  
23 *Gammaproteobacteria* (Gammaproteo.).



1

2 **Figure 4:** Detection of the WB genomospecies in different environments. **(A)**

3 Presence/absence matrix of WB gspp per sample. The columns correspond to

4 metagenomic samples, sorted by biome and source collection, and the rows

5 correspond to WB gspp, sorted by the presence/absence pattern using Ward's

6 hierarchical clustering of Euclidean distances. Empty cells in the matrix

7 correspond to TAD of zero (*i.e.*, sequencing breadth below 10%), grey cells

8 correspond to  $0 < \text{TAD} < 0.01X$ , and black cells correspond to  $\text{TAD} \geq 0.01X$ .

9 Large collections of metagenomic samples are indicated with horizontal bars at

10 the top and bottom and matching shading in the matrix, and correspond to

11 **Ch:LL:** Lake Lanier (Chattahoochee, this study), **Ch:OL:** other lakes from

12 Chattahoochee (this study), **L. Mendota:** Lake Mendota (WI, USA; JGI), **Ch:E:**

13 Estuaries from Chattahoochee (this study), **GOM:** Gulf of Mexico water column,

14 **OMZ:** Oxygen Minimum Zone, and **TARA:** Tara Ocean expedition. For

15 reference, the ticks on the left are spaced every 10 rows, and the marker colors

16 correspond to gspp with freshwater preference (blue), seawater preference (teal),

17 or no clear preference (grey; see also Fig. 5). **(B)** Summary statistics for gspp

18 detection. Each row corresponds to a set of samples, and the columns indicate

19 the total number of metagenomes (MGs), the number and fraction of

20 metagenomes with WB MAGs, and the number and fraction of WB gspp present

21 in the sample set. **(C)** Genomospecies in aquatic samples: freshwater (blue) and

22 seawater (teal). The different marks indicate the total number of gspp in each

1 environment (light bars) and the number of gspp found only in that environment  
2 (intermediate bars) and only in the Chattahoochee samples (dark bars).

3

4 **Figure 5:** Preference scores of the WB genomospecies in different sample sets.

5 **(A)** Preference scores for freshwater vs. seawater samples of all WB gspp.

6 Larger positive values indicate stronger preference towards freshwater, and

7 larger negative values stronger preference towards seawater. **(B)** Preference

8 scores for Chattahoochee lakes vs. Lake Mendota samples among gspp with

9 clear preference towards freshwater (blue squares in panel A). Larger positive

10 values indicate stronger preference for Chattahoochee lakes. Shaded areas

11 indicate excluded gspp (without clear preference towards freshwater). **(C)**

12 Preference scores for Lake Lanier vs. other Chattahoochee lakes samples

13 among gspp with clear preference towards Chattahoochee lakes (blue squares in

14 panel B). **(D)** Preference scores for estuarine vs. marine samples among gspp

15 with clear preference towards seawater (red squares in panel A).

16

17 **Figure 6:** Biome and aquatic habitat breadths as functions of genome coding

18 density and estimated size. The panels in the **top** display the coding density of

19 the genomes for each given biome breadth (left), aquatic habitat breadth

20 (center), and the histogram for all representative genomes (right) indicating two

21 outliers classified in the phyla “Proteobacteria” (p Proteo.) and “Cyanobacteria” (p

22 Cyano.) further discussed in the main text. The panels in the **middle** follow the

23 same layout, with the rightmost histogram highlighting an outlier classified in the

1 family *Caulobacteraceae* (f *Caulobact.*). Finally, the panels in the **bottom**  
2 indicate the distribution of genomes by biome (left) and aquatic habitat (right)  
3 breadths as bar plots with the total counts shown above each bar. Additionally,  
4 the bottom panels highlight the frequency of selected taxa that were  
5 overrepresented among cosmopolitans by the width of the colored sections (see  
6 legend), including the order “Ca. Pelagibacterales” (o Pelag.), the phylum  
7 “Actinobacteria” (p Actino.), the family *Synechococcaceae* (f *Synech.*), and the  
8 phylum “Bacteroidetes” (p Bacter.).

9

10 **Table 1:** Software used in this study, sorted by method sections.

11

## 1 **Supplementary Online Material**

2 **Figure S1:** Total Community Diversity captured by the WB MAGs collection. **(A)**

3 Shannon diversity ( $H'$ ) estimated on the WB genomospecies abundance profiles

4 (circles) and linear model of  $H'$  by  $N_d$  (Nonpareil sequence diversity index;

5 dashed line). The expected diversity based on  $N_d$  is presented for reference

6 (solid line) as derived previously [3]. Grey bands indicate the 95% confidence

7 interval of both linear models. **(B)** Residuals of the observed  $H'$  with respect to

8 the expected value; *i.e.*, distances between the circles and the solid line in panel

9 A. **(C)** Total added abundance of the entire MAG set as a fraction of the

10 community (y-axis) by  $N_d$ . Note the significant positive linear correlation in panel

11 B and the significant negative correlation in panel C, indicating that the more

12 diverse communities (larger  $N_d$ ) have poorer diversity coverage by the WB MAG

13 set (larger residuals in B, smaller total community fraction in C).

14

15 **Figure S2:** Phylogenetic reconstructions of two groups of MAGs and relatives.

16 **(A)** Genome representatives from seven phyla within the “Terrabacteria” group,

17 including “*Ca. Elulota*” proposed here. This species phylogeny represents a

18 coalescent-based reconstruction on the trees of 82 genes [38–40]. **(B)**

19 Representatives from four phyla within the “Terrabacteria” group, emphasizing

20 the class “*Ca. Limnocyndria*” in the phylum “Chloroflexi”. This class includes two

21 genera: “*Ca. Limnocyndrus*” (emended here) and “*Ca. Aquidulcis*” (proposed

22 here). This species phylogeny obtained by coalescent-based reconstruction

23 based on the trees of 67 genes. In both panels the genomes derived from

1 metagenomes (MAGs) are prefixed with a label in squared brackets indicating  
2 the study from where they were derived, including: A13 [82], B15 [53], M18 [6],  
3 P18 [83], and Z18 [84], as well as the current study (This study) or publicly  
4 available data currently missing a published manuscript (Unpub). Genomes  
5 including a 16S rRNA gene sequence are marked with an asterisk.

6

7 **Figure S3:** Histograms of 80% central truncated average sequencing depth  
8 (TAD) all WB genomospecies in all Chattahoochee samples (top) and all other  
9 samples (bottom). Genomospecies with non-zero TAD (*i.e.*, a sequencing  
10 breadth > 10%) were considered confidently present if TAD was at least 0.01X  
11 (black), and uncertain otherwise (grey). The values of absent, uncertain, and  
12 present also correspond to the values in Fig. 4.

13

14 **Figure S4:** Phylogenetic diversity of the WB collection of MAGs in the context of  
15 best matches to other genomic collections (**A-B**) and the reference collection of  
16 genomes in PhyloPhlAn (**C-D**). In panels A and C, the X-axis corresponds to the  
17 phylogenetic distance (branch lengths, bottom scale) at which the tree is cut into  
18 clades (numbers on top). These clades are then classified as containing only  
19 genomes from the WB collection (blue), only genomes from the reference  
20 database (grey), or both (blue and grey pattern). In panels B and D, the overall  
21 fraction of the tree (in branch lengths) covered by each category is summarized  
22 as Faith's Phylogenetic Diversity (bar graph) in order to estimate the  
23 phylogenetic gain (right). Additionally, panel A includes an approximated

1 phylogenetic calibration for the taxonomic ranks of species, genus, class, and  
2 phylum (vertical dashed lines). Each of these points also include the number of  
3 taxa only represented in the WB collection (novel) and the total number of taxa  
4 formed at the calibrated point.

5

6 **Figure S5:** Metrics of Ecologic Range and their correlation with genomic  
7 signatures. The y-axes (rows) indicate the genomic signatures evaluated, with  
8 the summary histograms in the rightmost panels. Conversely, the x-axes  
9 (columns) indicate the ecologic ranges, with summary histograms in the bottom  
10 panels. Both the correlation statistic (Pearson's R or Spearman's  $\rho$ ) and the  
11 corresponding p-value are shown underneath each panel, with significant  
12 correlations ( $p$ -value < 0.01) highlighted in green (positive) and red (negative).  
13 The ecologic range metrics evaluated (left-to-right) are: biome count breadth (out  
14 of 13 biomes), aquatic habitat count breadth (out of 5 habitats), unweighted  
15 Levins' breadths of biome and aquatic habitat (natural units), weighted Levins'  
16 breadths of biome and aquatic habitat (natural units), geodesic range (thousands  
17 of km), and latitude range (degrees). The genomic features evaluated (from top-  
18 to-bottom) are: coding density (%), expected genome size (Mbp), G+C content  
19 (%), frequency of the J COG category (%), minimum generation time (h), and  
20 optimal growth temperature ( $^{\circ}$ C).

21

1 **Table S1:** Metagenomic datasets from water bodies along the Chattahoochee  
2 River used here, including accession numbers, sample attributes,  
3 physicochemical parameters, and sequencing attributes.

4

5 **Table S2:** Metagenome-Assembled Genomes (MAGs) from the WB collection  
6 and general statistics.

7

8 **Table S3:** Metagenomic datasets from other studies used here to determine  
9 geographic and environmental breadth or preference. The column “Collection  
10 name” corresponds to the collections in Fig. 1. The columns “Sample accession”  
11 and “Run” correspond to the BioSample and Run accessions in the SRA/ENA  
12 databases, respectively. Additional metadata is provided as derived from MGnify  
13 or the original studies. The column “Reference” indicates the source study,  
14 corresponding to references [13, 52–65], or “Unpublished” corresponding to data  
15 publicly available in the SRA/ENA databases but currently not linked to  
16 publications.

17

18 **Text S1:** Additional details on materials and methods used in the present study.

19

20 **Text S2:** Additional details on population abundance and community diversity  
21 estimation.

22

- 1 **Text S3:** Additional methodology, results, and protologues for novel lineages
- 2 described here: “*Ca. Elulimicrobium humile*” gen. nov. sp. nov. and “*Ca.*
- 3 *Aquidulcis frankliniae*” gen. nov. sp. nov.
- 4



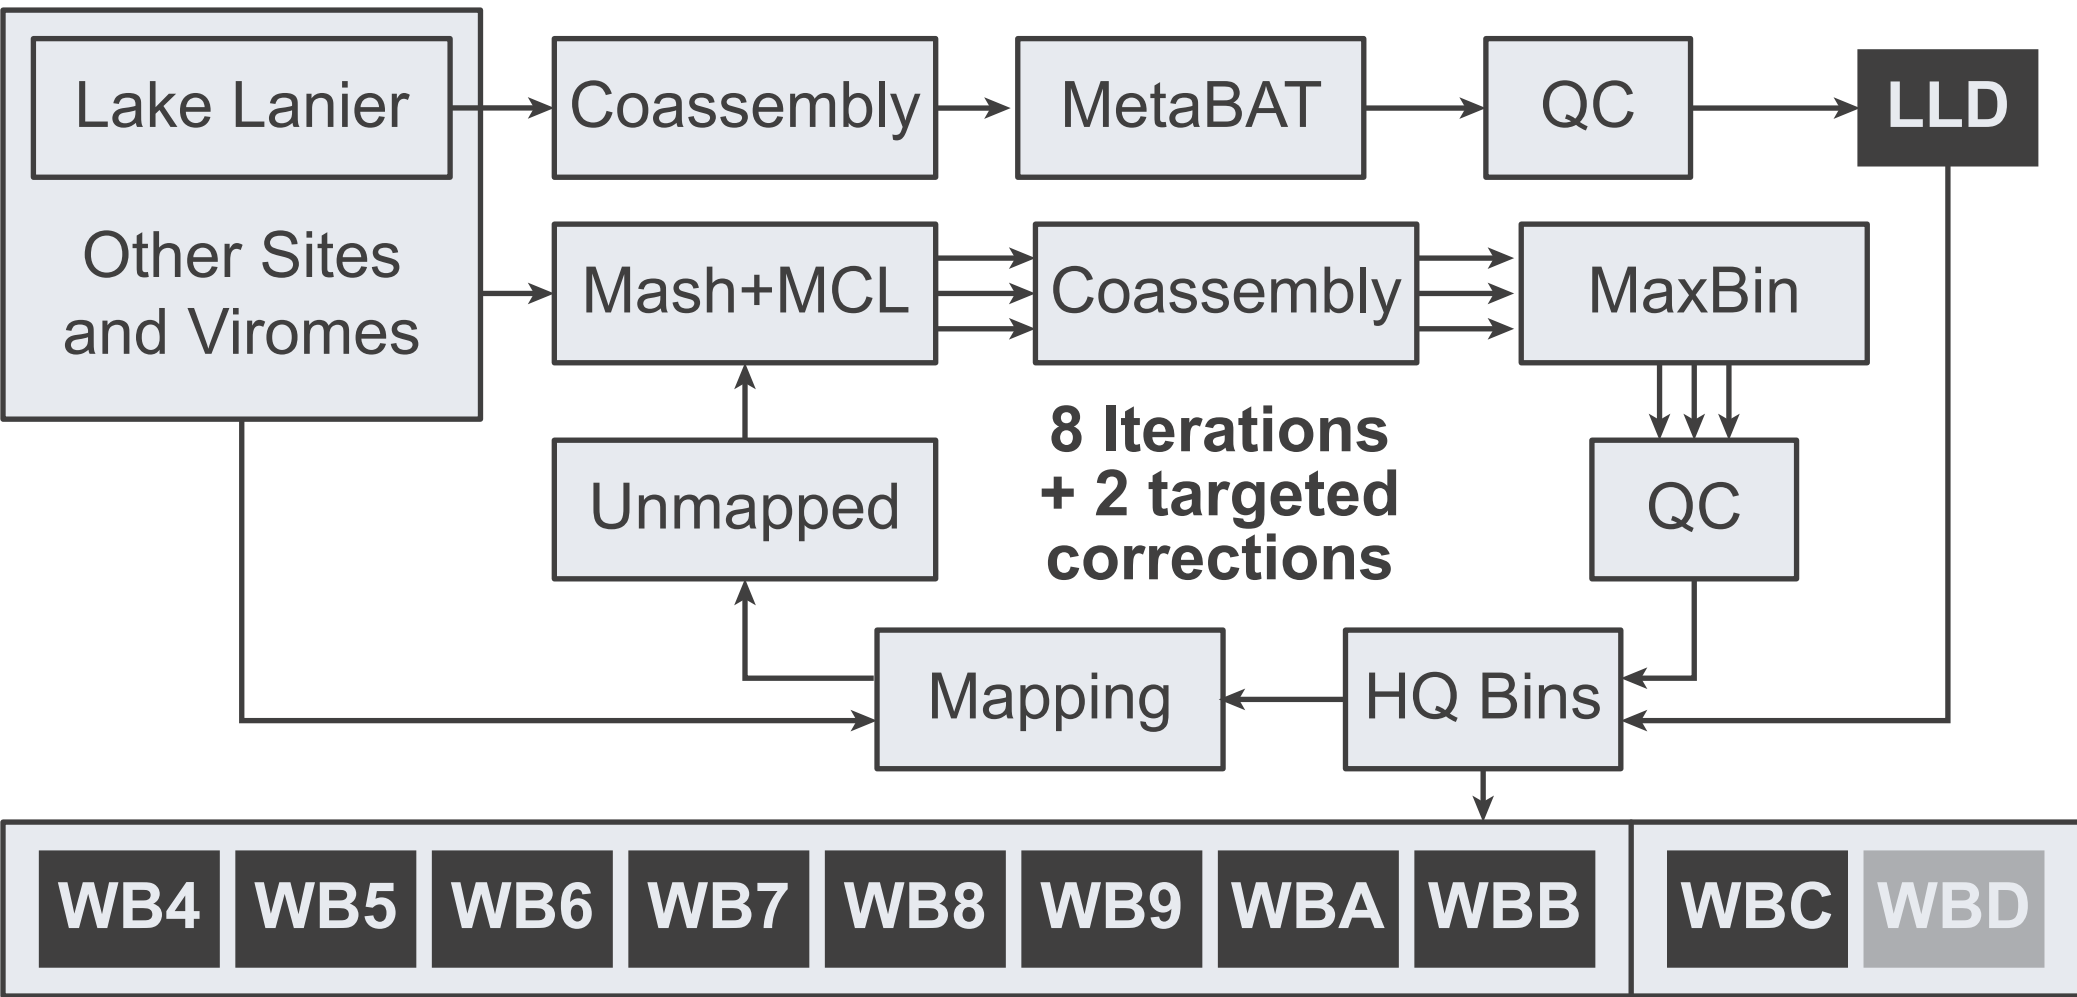

## A. Cumulative Clades

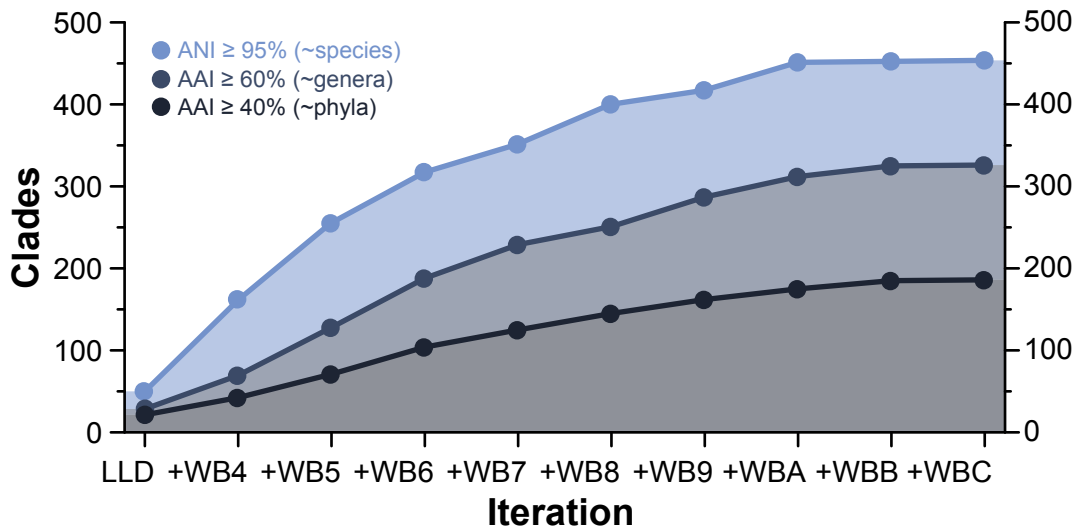

## B. Lake Lanier

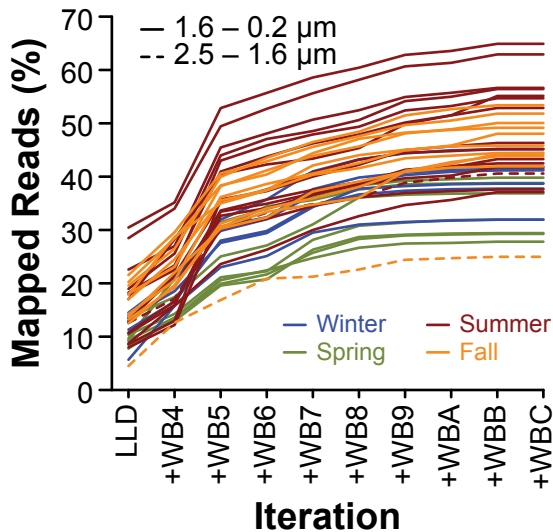

## C. Other Sites

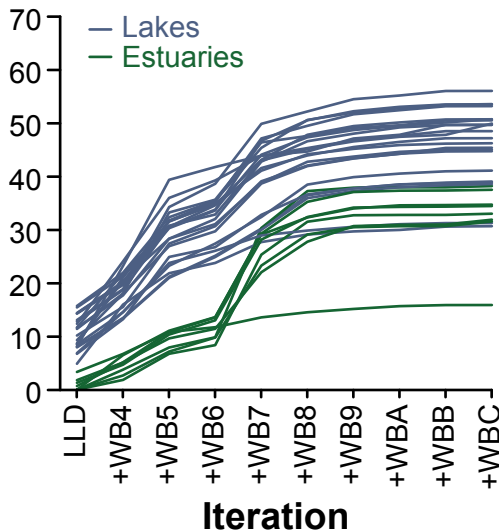

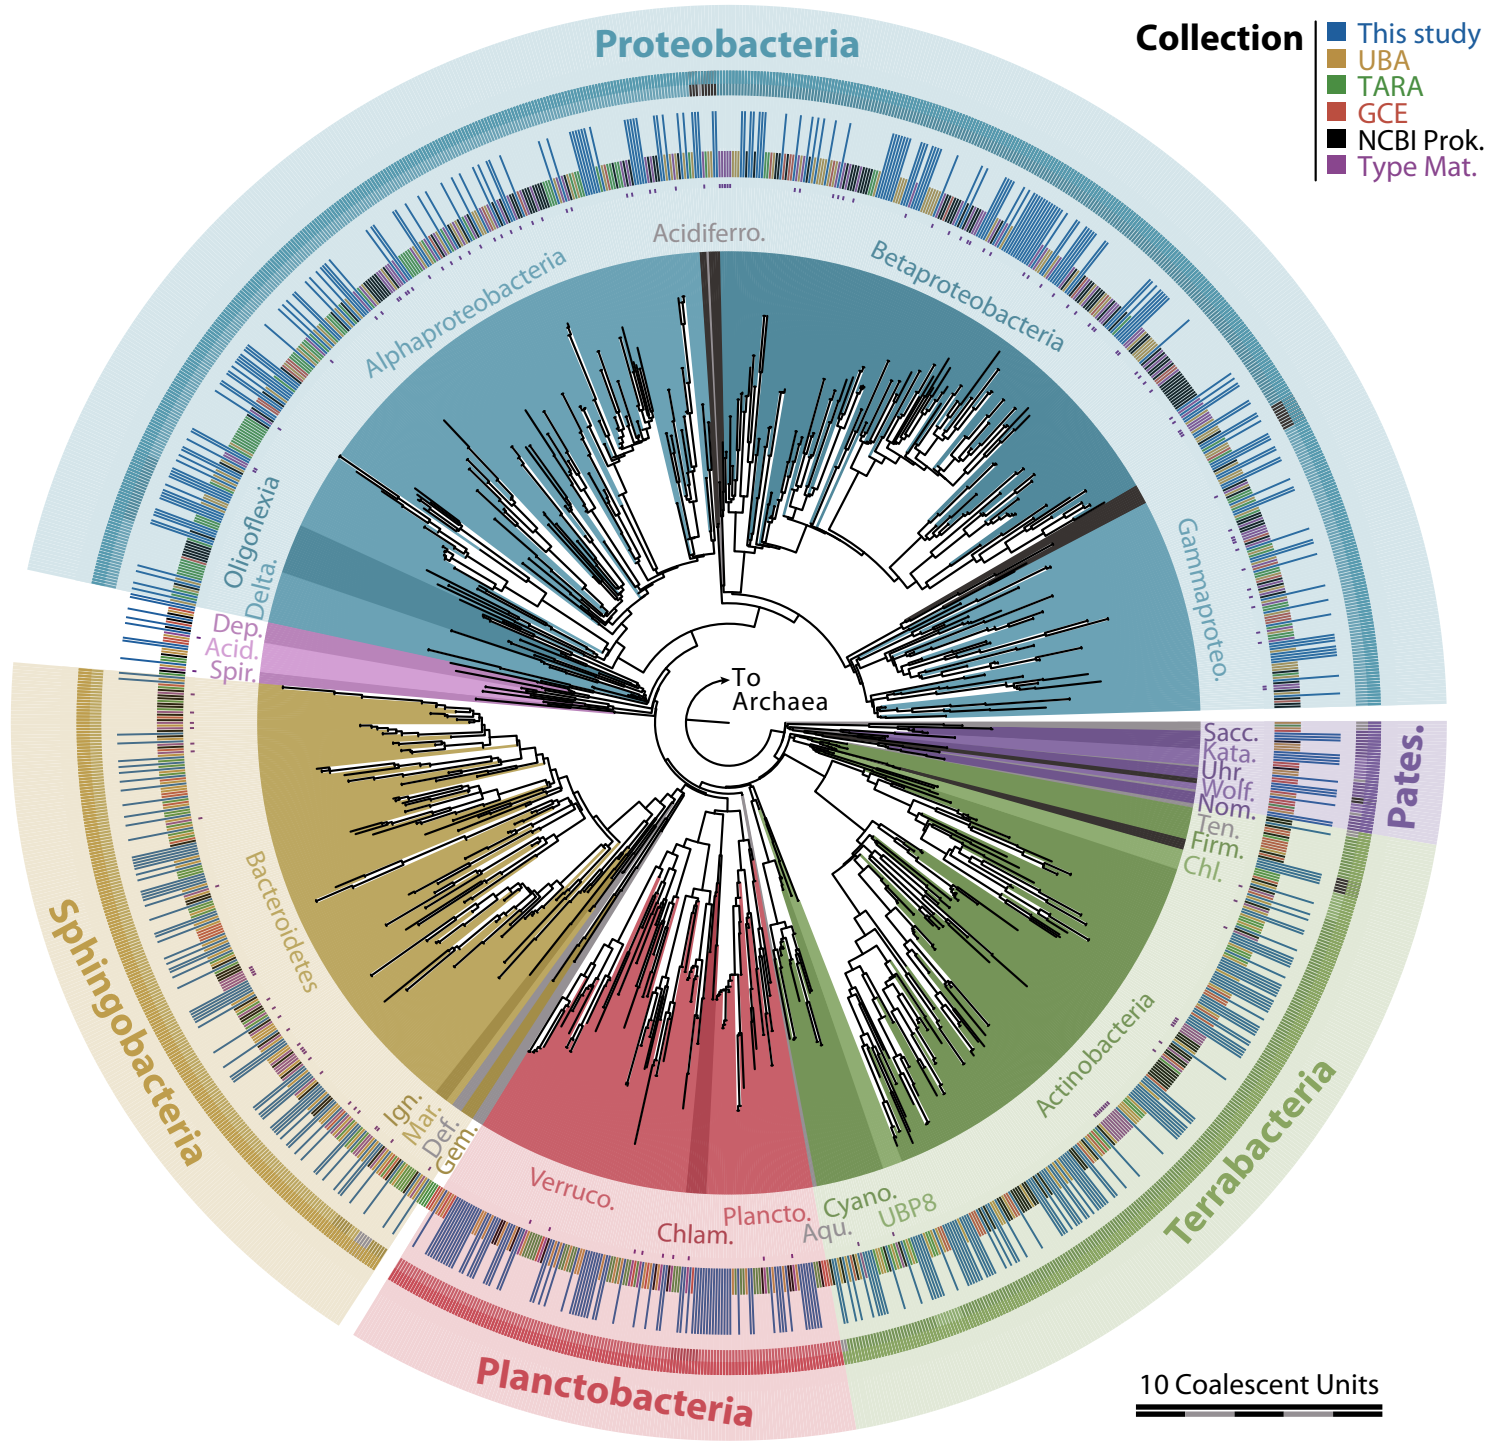

## A. Presence / absence matrix of WB genomospecies per sample

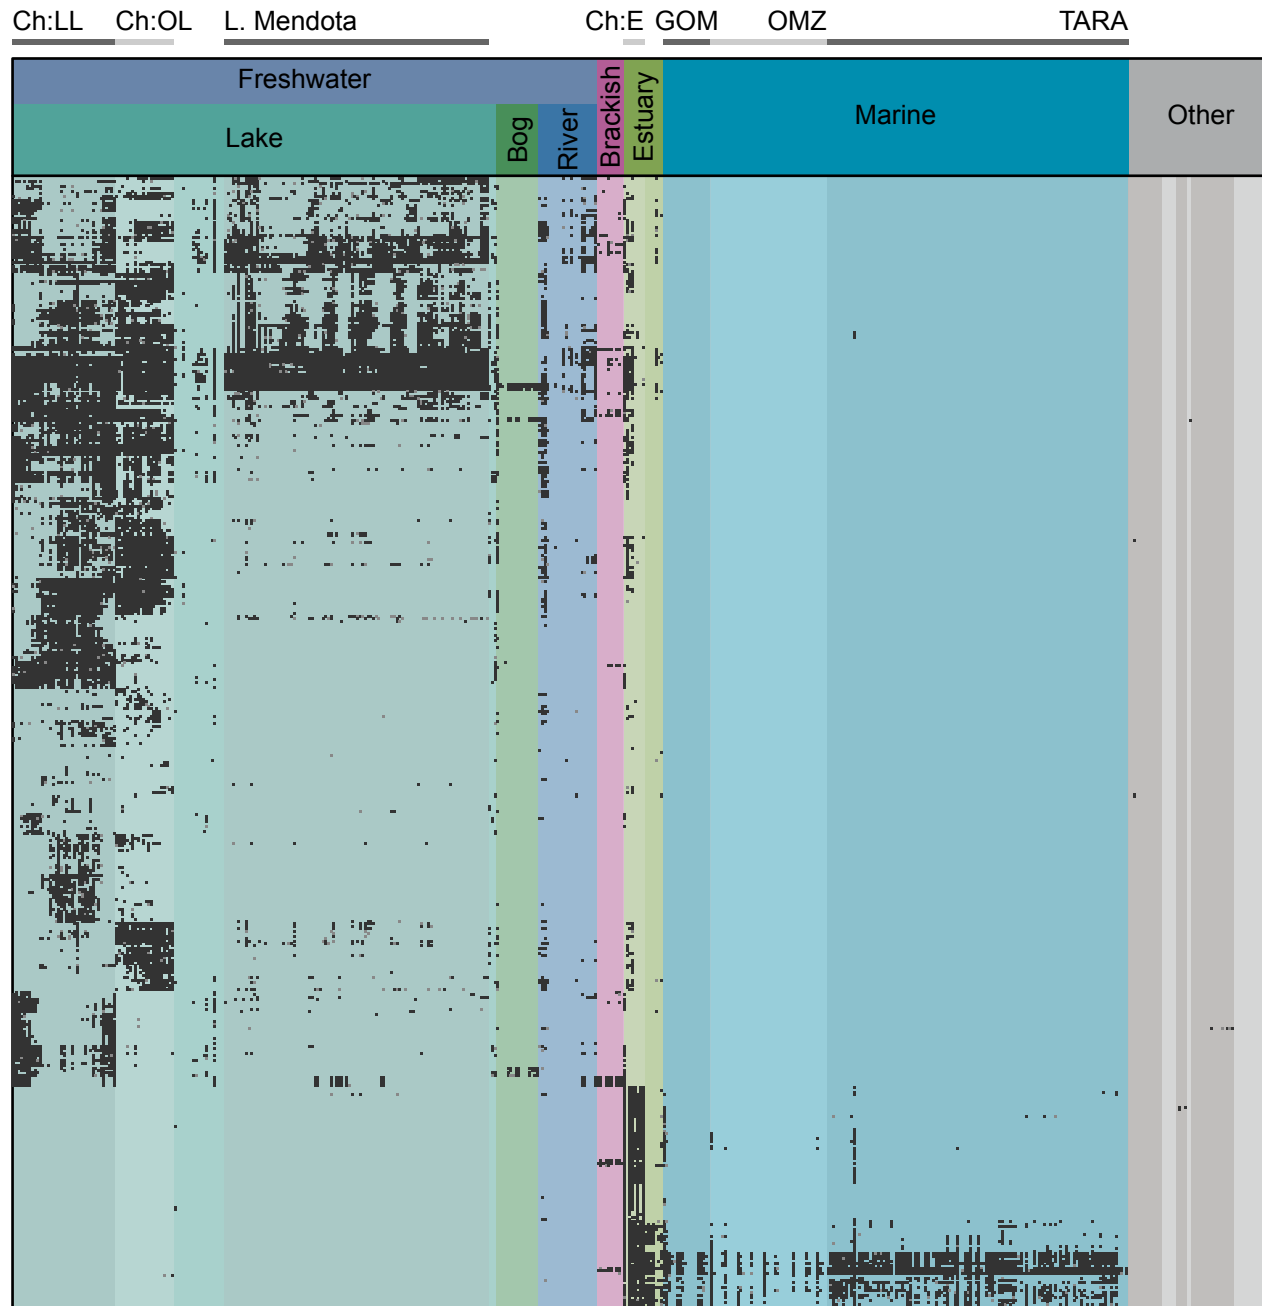

## B. Genomospecies range

|                   | MGs        | Metagenomes with WB MAGs | WB genomosp. present |
|-------------------|------------|--------------------------|----------------------|
| <b>Freshwater</b> | <b>246</b> | <b>231</b>               | <b>462</b>           |
| <b>Lake</b>       | <b>184</b> | <b>175</b>               | <b>374</b>           |
| Ch:LL             | 39         | 39                       | 342                  |
| Ch:OL             | 22         | 22                       | 269                  |
| L. Mendota        | 100        | 100                      | 164                  |
| <b>Bog</b>        | <b>15</b>  | <b>15</b>                | <b>10</b>            |
| <b>River</b>      | <b>22</b>  | <b>17</b>                | <b>191</b>           |
| <b>Brackish</b>   | <b>10</b>  | <b>9</b>                 | <b>34</b>            |
| <b>Estuary</b>    | <b>15</b>  | <b>15</b>                | <b>286</b>           |
| Ch:E              | 8          | 8                        | 279                  |
| <b>Marine</b>     | <b>176</b> | <b>143</b>               | <b>77</b>            |
| GOM               | 18         | 13                       | 60                   |
| OMZ               | 44         | 18                       | 35                   |
| TARA              | 114        | 112                      | 63                   |
| <b>Other</b>      | <b>54</b>  | <b>9</b>                 | <b>7</b>             |
| Groundwater       | 13         | 1                        | 3                    |
| Glacier           | 4          | 0                        | 0                    |
| Est. sediment     | 4          | 2                        | 2                    |
| Lake sediment     | 3          | 1                        | 1                    |
| Soil              | 16         | 5                        | 1                    |
| Human gut         | 14         | 0                        | 0                    |

## C. Genomospecies in aquatic samples

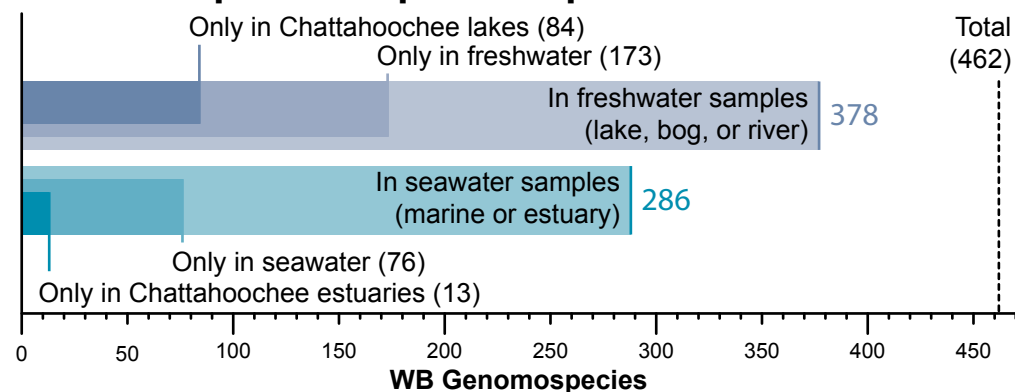

## A. Freshwater vs Seawater (All Genomospecies)

Freshwater: n=357 (77%) Seawater: n=85 (18%) No preference: n=20 (4%)

Score ■ > 1 ■ [-1, 1] ■ < -1

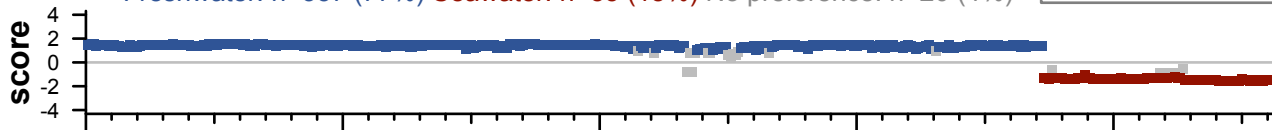

## B. Chattahoochee vs Mendota Lakes (Freshwater Genomospecies)

Chattahoochee: n=262 (73%) Mendota: n=33 (9%) No preference: n=62 (17%)

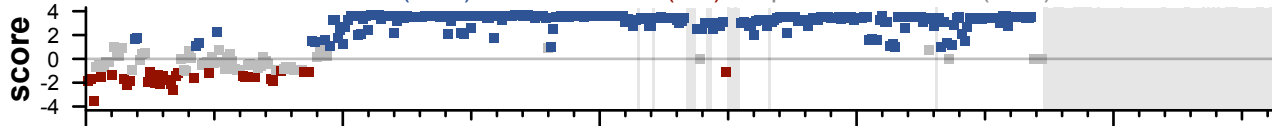

## C. Lake Lanier vs Other Lakes (Chattahoochee Genomospecies)

Lanier: n=147 (56%) Other: n=41 (16%) No preference: n=73 (28%)

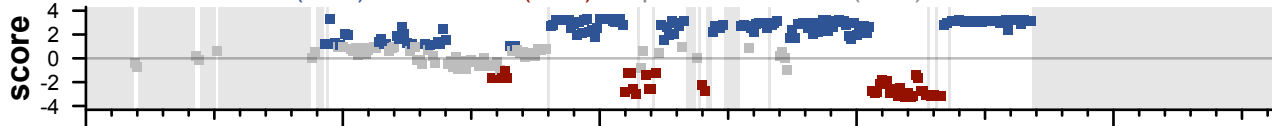

## D. Estuarine vs Marine (Seawater Genomospecies)

Estuarine: n=45 (53%) Seawater: n=22 (26%) No preference: n=18 (21%)

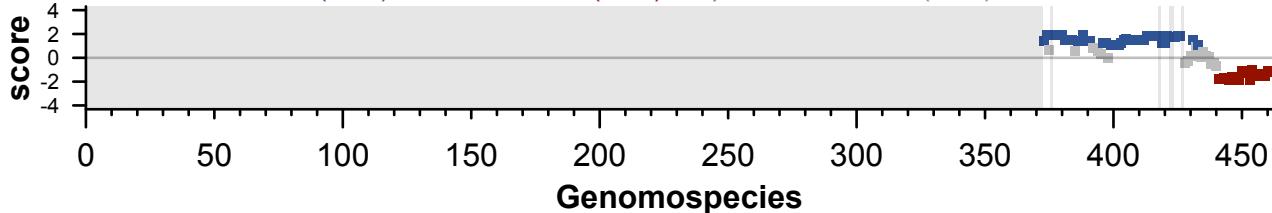

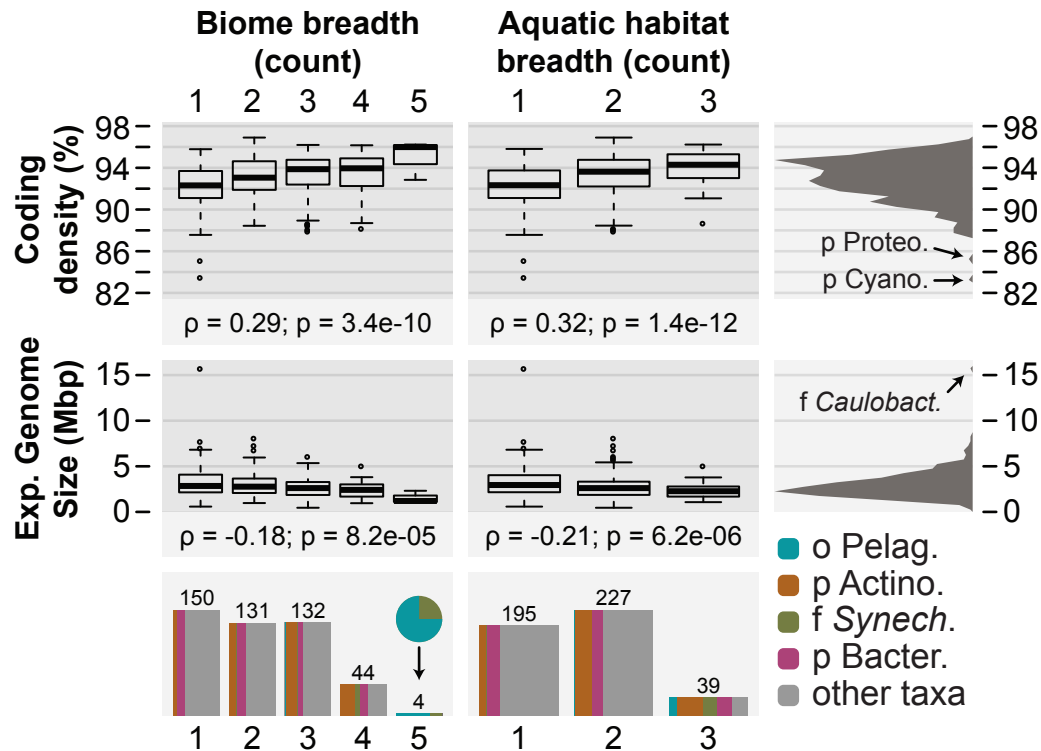

| §                                                  | Process                       | Software Package     | Method                          | Version      | Parameters                                                             | Ref.     | URL                                                                                                     |
|----------------------------------------------------|-------------------------------|----------------------|---------------------------------|--------------|------------------------------------------------------------------------|----------|---------------------------------------------------------------------------------------------------------|
| <b>Sequencing Data Processing</b>                  |                               |                      |                                 |              |                                                                        |          |                                                                                                         |
|                                                    | Read trimming                 | SolexaQA++           | dynamictrim, lengthsort         | 1.3.3        | minimum PHRED quality score of 20 and minimum fragment length of 50 bp | [18]     |                                                                                                         |
|                                                    | Read clipping                 | Scythe               |                                 | 0.991        | Default                                                                |          | <a href="https://github.com/vsbuffalo/scythe">https://github.com/vsbuffalo/scythe</a>                   |
|                                                    | Metagenomic coverage          | Nonpareil            |                                 | 2.4          | Default                                                                | [19]     |                                                                                                         |
| <b>Iterative Subtractive Binning</b>               |                               |                      |                                 |              |                                                                        |          |                                                                                                         |
|                                                    | Read assembly                 | IDBA                 | idba_ud                         | 1.1.1        | Default                                                                | [20]     |                                                                                                         |
|                                                    | Contig fragmentation          | Enveomics Collection | FastA.slider.pl                 |              | Windows of 1,000 bp with overlap of 200 bp (-win 1000 -step 800)       | [21]     |                                                                                                         |
|                                                    | LLD binning                   | MetaBAT              |                                 | 0.26.3       | Default                                                                | [22]     |                                                                                                         |
|                                                    | LLD quality check             | CheckM               |                                 |              | Default                                                                | [23]     |                                                                                                         |
|                                                    | MCL clustering                | Enveomics Collection | ogs.mcl.rb                      |              | Inflation 5                                                            | [21, 24] |                                                                                                         |
|                                                    | Metagenome distance           | Mash                 |                                 | 1.0.2        | Sketch size 10,000                                                     | [25]     |                                                                                                         |
|                                                    | Coassembly                    | IDBA                 | idba_ud                         | 1.1.1        | With pre-correction                                                    | [20]     |                                                                                                         |
|                                                    | Iterative binning             | MaxBin               |                                 | 2.1.1        | Default                                                                | [26]     |                                                                                                         |
|                                                    | Iterative read mapping        | Bowtie               |                                 | 2.1.0        | Default                                                                | [27]     |                                                                                                         |
|                                                    | Iterative quality check       | MiGA                 | summary                         | 0.3.0.7      | popgenome mode                                                         | [28]     |                                                                                                         |
|                                                    | Unmapped read extraction      | SAMtools             | view                            | 1.0          | -F 2                                                                   | [29]     |                                                                                                         |
|                                                    | Archaeal correction           | MiGA                 | summary                         | 0.3.1.0      | popgenome mode                                                         | [28]     |                                                                                                         |
|                                                    | CPR correction                | Anvi'o               | anvi-script-predict-CPR-genomes | v5, Margaret | Default                                                                | [30]     |                                                                                                         |
| <b>Genome Quality and Taxonomic Classification</b> |                               |                      |                                 |              |                                                                        |          |                                                                                                         |
|                                                    | Quality and taxonomy          | MiGA                 | summary, ls                     | 0.3.1.6      | popgenome mode, p-value < 0.05 for taxonomic classification            | [28]     |                                                                                                         |
| <b>Genome Phylogeny</b>                            |                               |                      |                                 |              |                                                                        |          |                                                                                                         |
|                                                    | Initial phylogeny             | PhyloPhlAn           |                                 | 0.33         | --integrate function (400 marker proteins from 3,737 genomes)          | [33]     |                                                                                                         |
|                                                    | Marker proteins               | Enveomics Collection | HMM.essential.rb                |              |                                                                        | [21]     |                                                                                                         |
|                                                    | Multiple sequence alignment   | Clustal Omega        |                                 | 1.2.1        | Default                                                                | [37]     |                                                                                                         |
|                                                    | Gene tree reconstruction      | RAxML                |                                 | 8.2.9        | Default                                                                | [38]     |                                                                                                         |
|                                                    | Gene model selection          | ProtTest             |                                 | 3.4.2        | Default (using Bayesian Information Criterion)                         | [39]     |                                                                                                         |
|                                                    | Species tree reconstruction   | ASTRAL-III           |                                 | 5.6.3        | Default                                                                | [40]     |                                                                                                         |
|                                                    | Phylogenetic diversity        | Picante              | pd                              | 1.7          | Excluding root                                                         | [42]     |                                                                                                         |
|                                                    | Tree taxonomy decoration      | tax2tree             | nlevel                          | 1            | Default                                                                | [43]     |                                                                                                         |
|                                                    | Tree visualization            | FigTree              |                                 | 1.4.2        |                                                                        |          | <a href="http://tree.bio.ed.ac.uk/software/figtree/">http://tree.bio.ed.ac.uk/software/figtree/</a>     |
| <b>Genome Annotation</b>                           |                               |                      |                                 |              |                                                                        |          |                                                                                                         |
|                                                    | General annotation            | Prokka               |                                 | 1.13         | Default                                                                | [44]     |                                                                                                         |
|                                                    | Genome statistics             | MiGA                 | summary                         | 0.3.1.6      | popgenome mode                                                         | [28]     |                                                                                                         |
|                                                    | Growth prediction             | growthpred           |                                 | 1.07         | -c 0 -S -t                                                             | [46]     |                                                                                                         |
|                                                    | Traits prediction             | Traitar              | from_nucleotides                | 1.0.4        | Default                                                                | [48]     |                                                                                                         |
|                                                    | Protein localization          | PSORTb               |                                 | 3.0          | --archaea, --positive, or --negative defined by taxonomy or Traitar    | [47]     |                                                                                                         |
| <b>Abundance and Alpha Diversity</b>               |                               |                      |                                 |              |                                                                        |          |                                                                                                         |
|                                                    | Read mapping                  | Bowtie               |                                 | 2.3.2        | Default, using FastQ format after quality control                      | [27]     |                                                                                                         |
|                                                    | Sequencing depth per position | bedtools             | genomecov                       | 2.25         | -bga                                                                   | [49]     |                                                                                                         |
|                                                    | Truncated Average Depth       | Enveomics Collection | BedGraph.tad.rb                 |              | 80% central values                                                     | [21]     |                                                                                                         |
|                                                    | Genome equivalents            | MicrobeCensus        |                                 | 1.0.7        | Default                                                                | [50]     |                                                                                                         |
|                                                    | Sequence diversity index      | Nonpareil            |                                 | 2.4          | Default                                                                | [3, 19]  |                                                                                                         |
|                                                    | Shannon diversity index       | Enveomics Collection | AlphaDiversity.pl               |              | Default                                                                | [21]     |                                                                                                         |
| <b>Metrics of Ecologic Range</b>                   |                               |                      |                                 |              |                                                                        |          |                                                                                                         |
|                                                    | Geographic distance           | geosphere            | distVincentyEllipsoid           |              | Default                                                                |          | <a href="https://cran.r-project.org/package=geosphere">https://cran.r-project.org/package=geosphere</a> |
|                                                    | Brownian model                | ape                  | corBrownian                     |              | Default                                                                | [69]     |                                                                                                         |
|                                                    | Phylogenetic least squares    | nlme                 | gls, anova.gls                  |              |                                                                        |          | <a href="https://CRAN.R-project.org/package=nlme">https://CRAN.R-project.org/package=nlme</a>           |
